# Supplementary material for: Decoding the dual recognition mechanism of the glucocorticoid receptor for DNA and RNA: sequence versus shape
Source: PubMed Central journal article supplement (PMC10522765; doi:10.1038/s41598-023-43244-1), 2023-09-26
Supplement: 41598_2023_43244_MOESM1_ESM.pdf [file 41598_2023_43244_MOESM1_ESM.pdf]

## Decoding the Dual Recognition Mechanism of Glucocorticoid Receptor for DNA and RNA: Sequence vs. Shape

Hörberg Johanna & Reymer\* Anna

Department of Chemistry and Molecular Biology, University of Gothenburg, 405 30  
Göteborg, Sweden. \* Email to: [anna.reymer@gu.se](mailto:anna.reymer@gu.se)

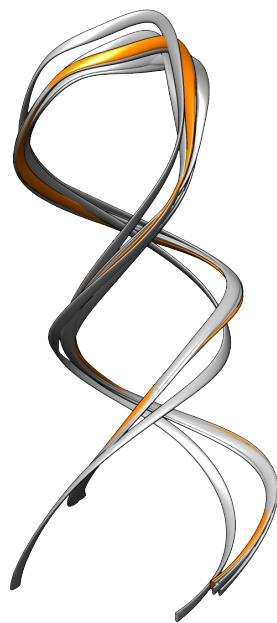

GRE\_RNA

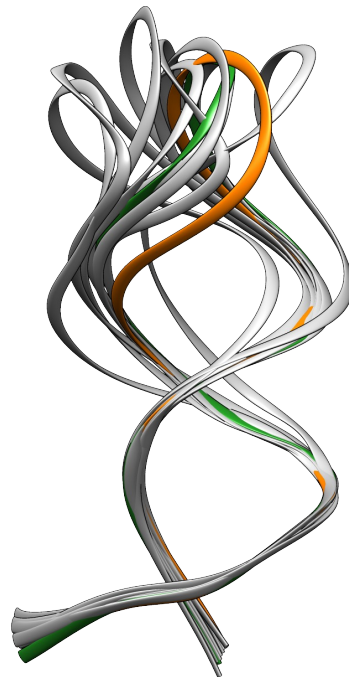

Gas5

**Figure S1:** Derived models of GRE\_RNA and Gas5\_RNA. Models highlighted with orange (the highest ranked model) and green (the second highest ranked model) were used for the docking studies.

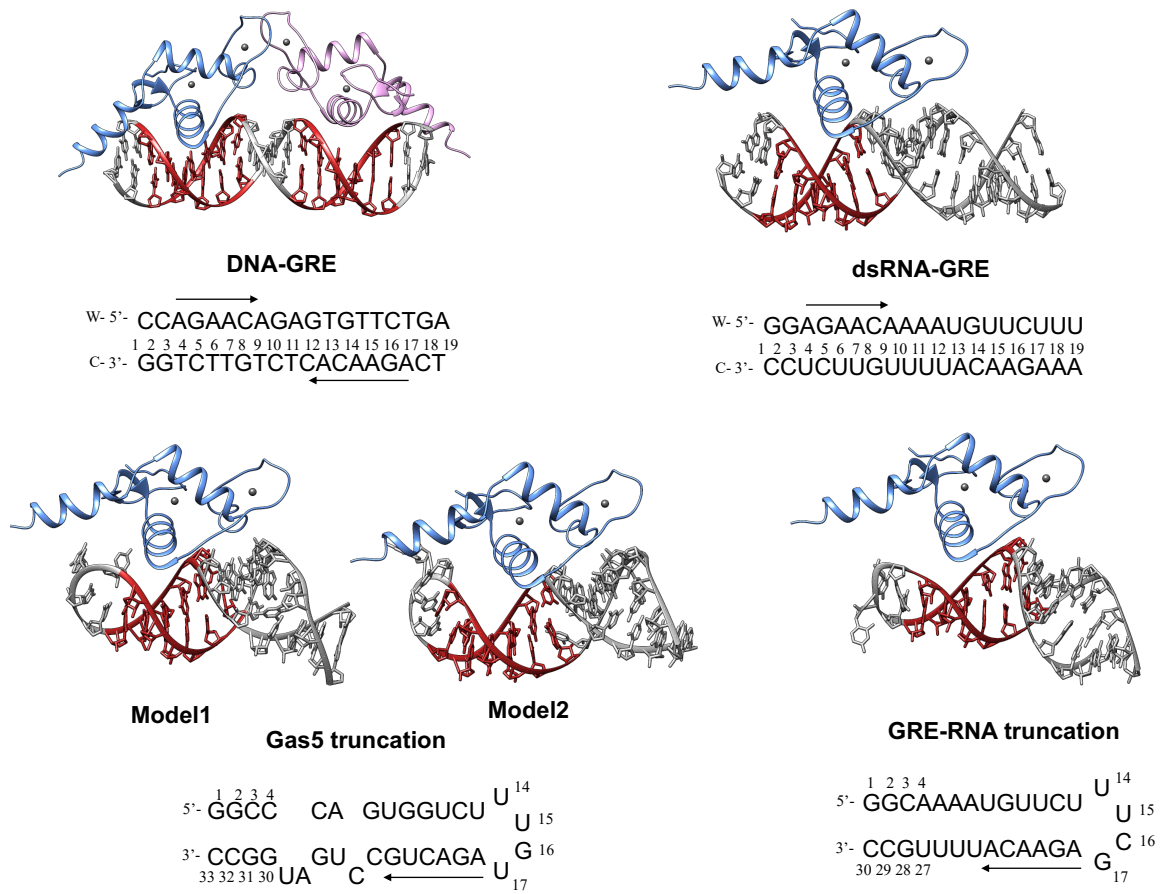

**Figure S2:** Prepared GR-DNA/RNA complexes.

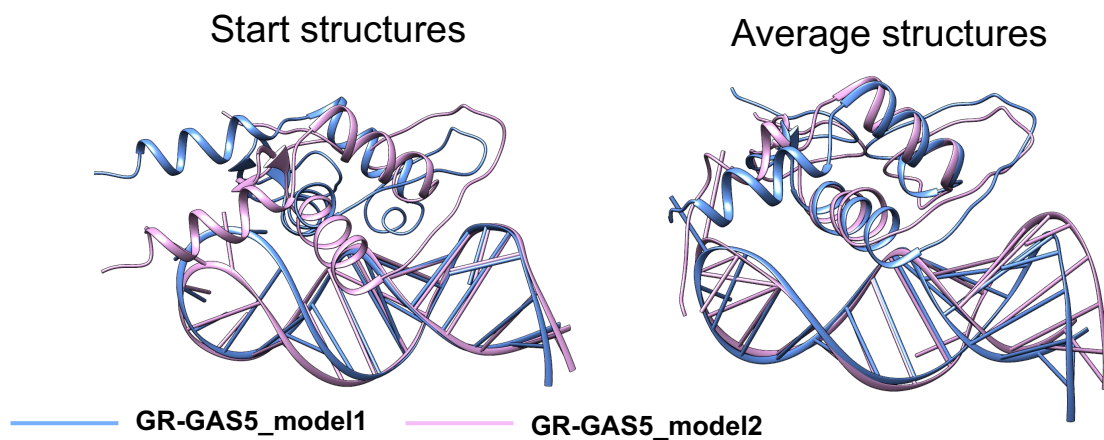

**Figure S3:** Comparison of GR-Gas5 model1 and model2 starting and average structures.

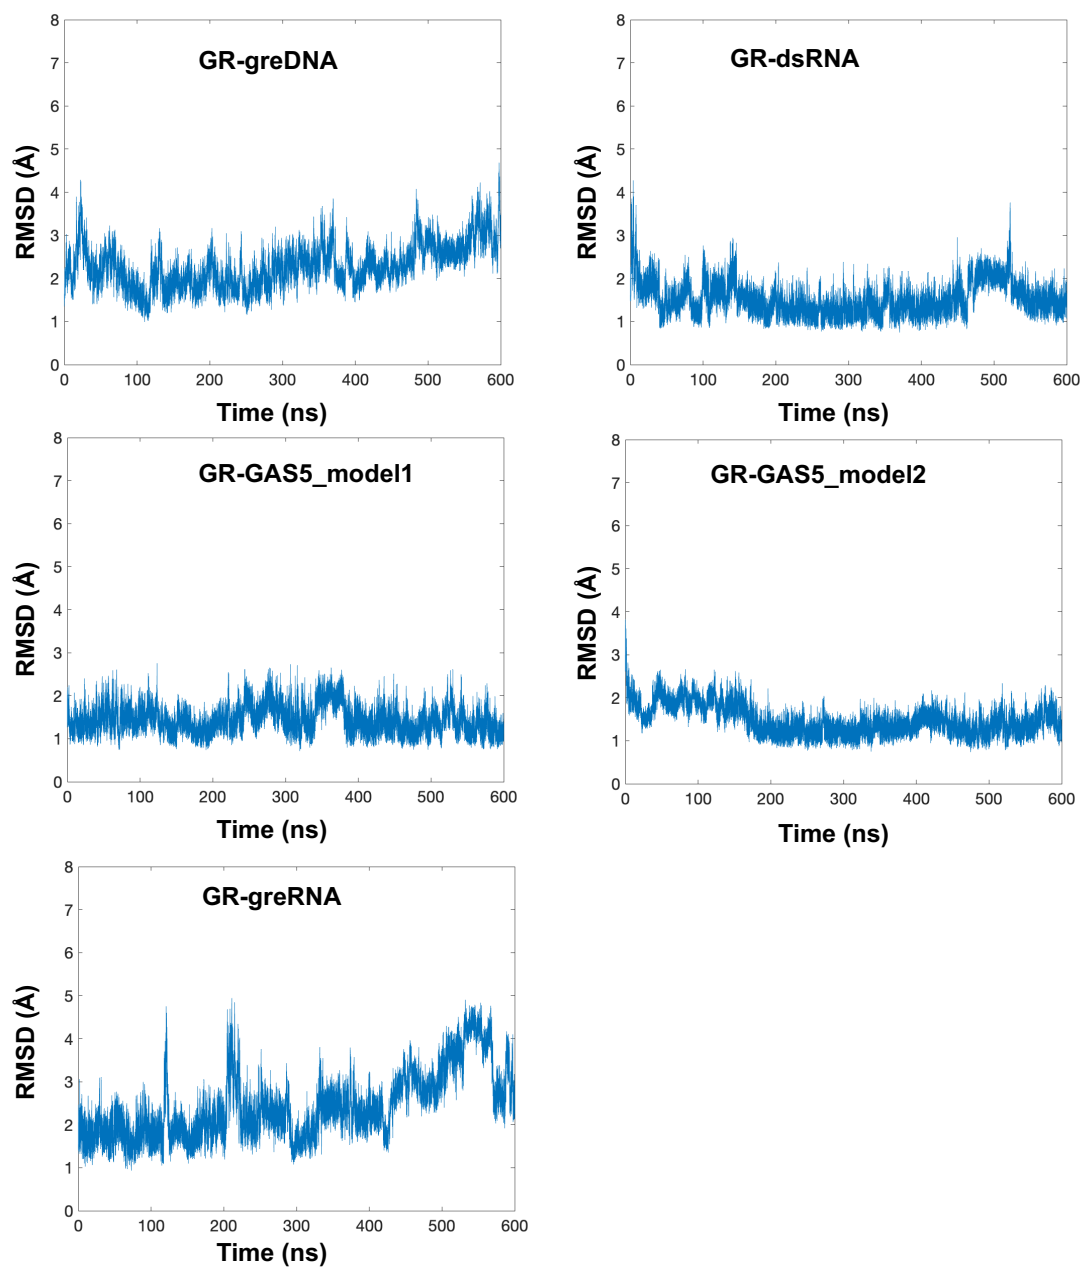

**Figure S4:** Fluctuations of protein heavy atoms RMSD relative to the average structures for the whole md trajectory.

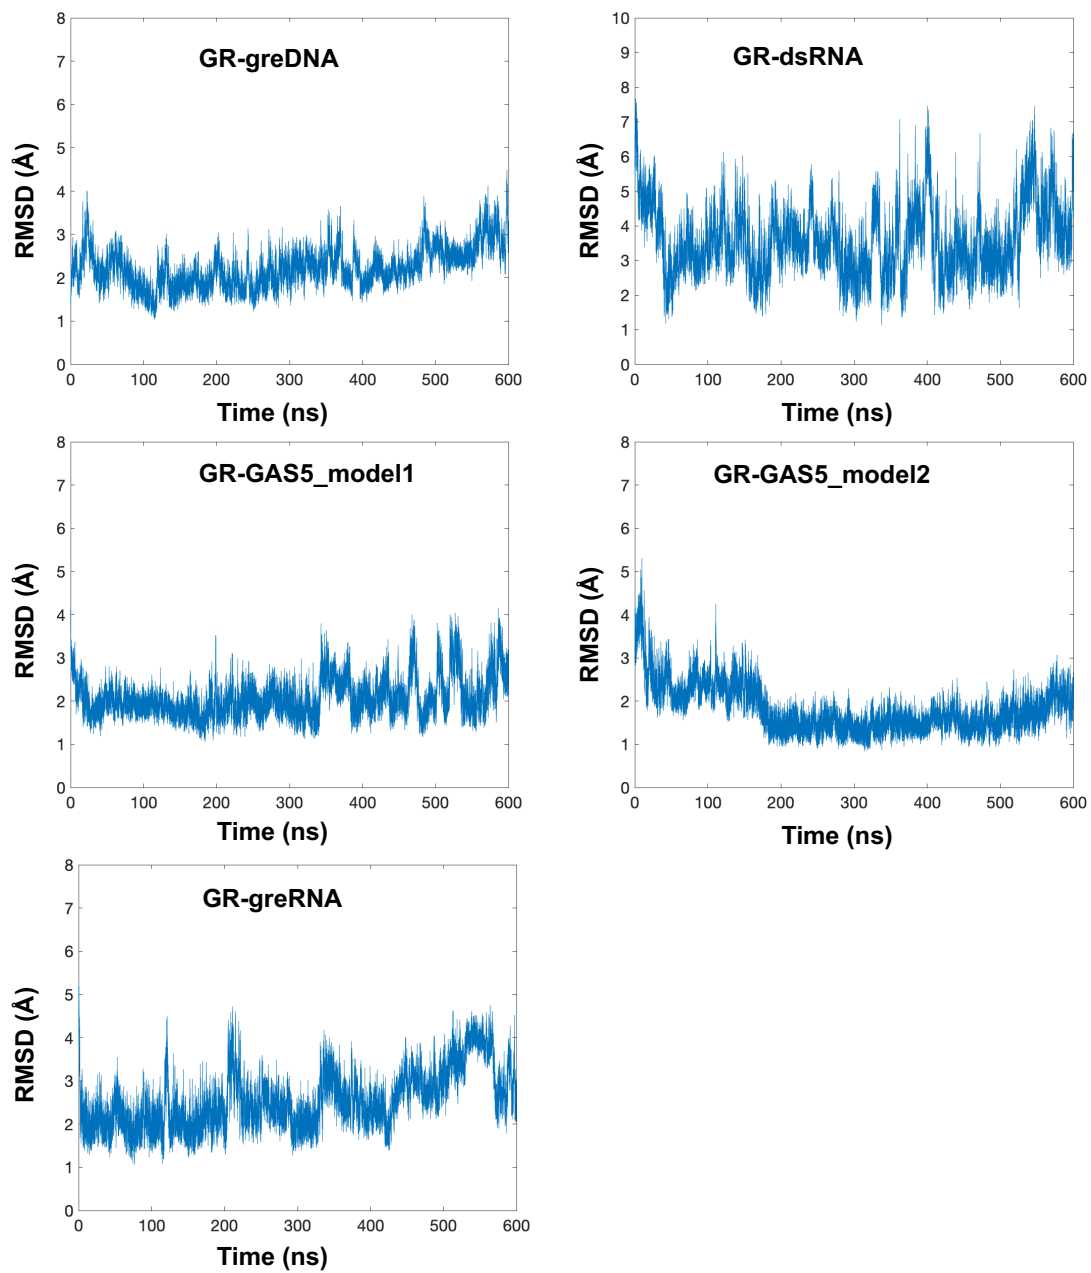

**Figure S5:** Fluctuations of protein-DNA/RNA complex heavy atoms RMSD relative to the average structures for the whole md trajectory.

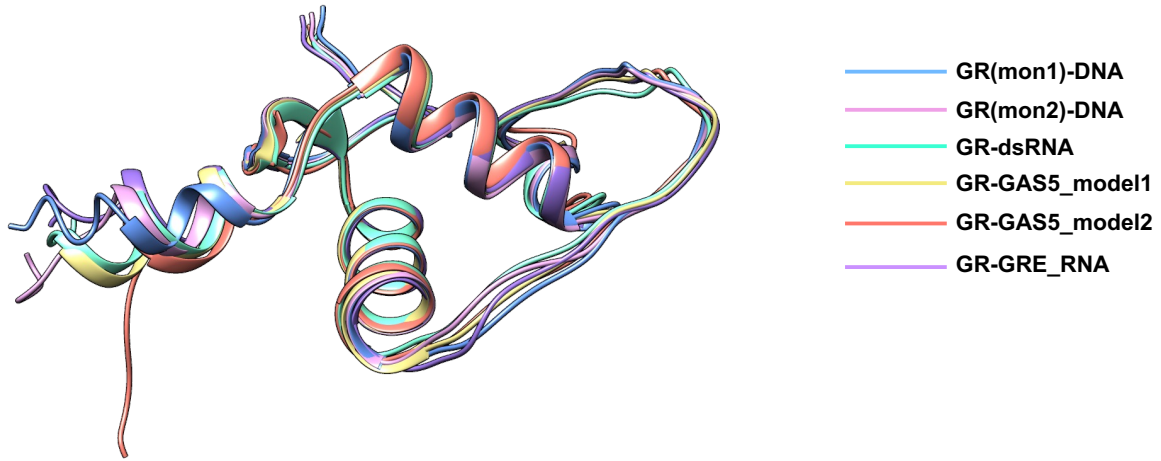

**Figure S6:** Comparison of GR from all average structures, illustrating that predominant conformational changes occur at helix4.

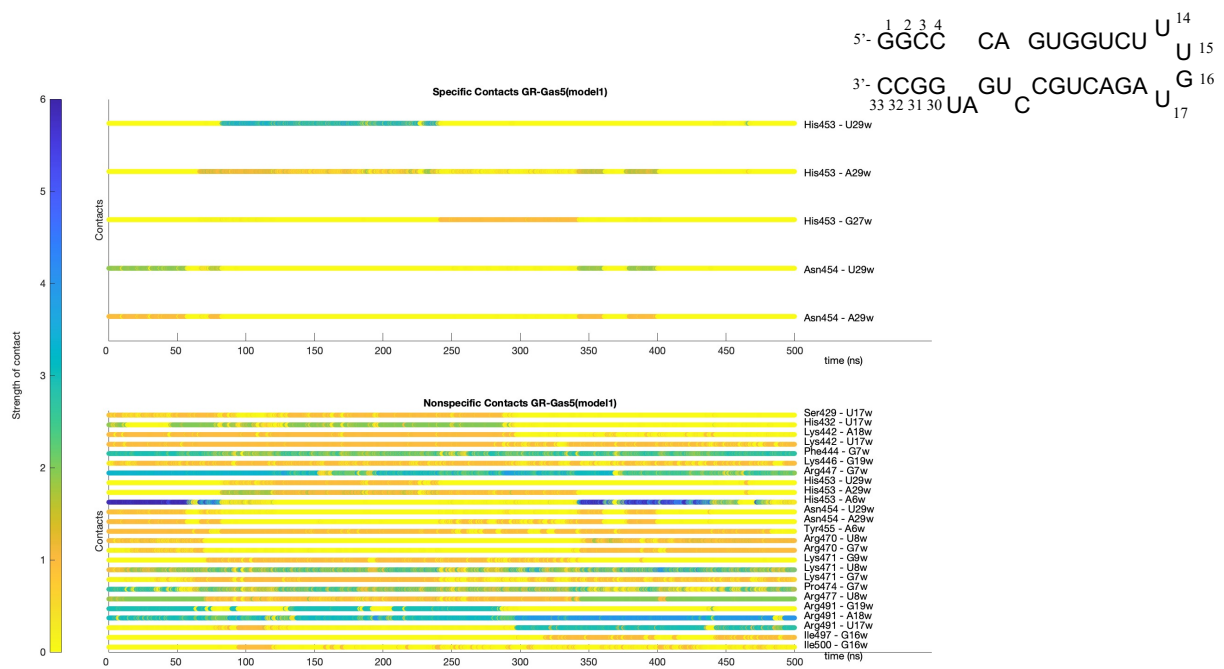

**Figure S7:** Dynamic contacts map for the specific and nonspecific GR-Gas5\_RNA\_model1 interactions.

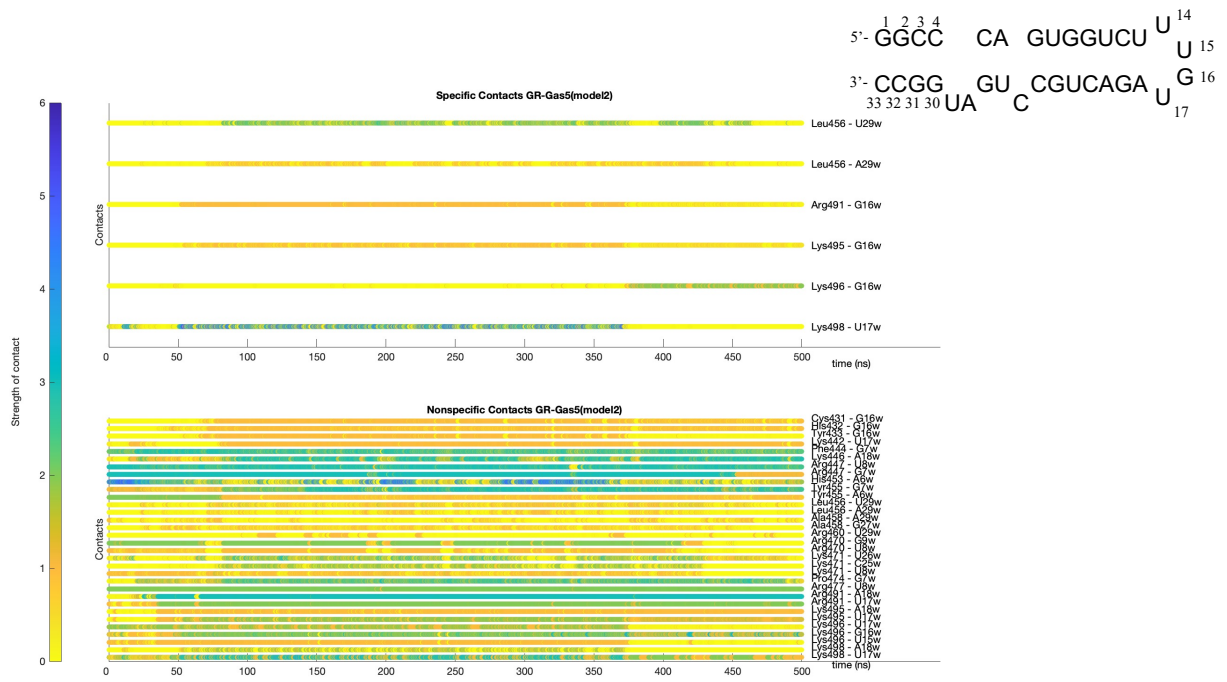

**Figure S8:** Dynamic contacts map for the specific and nonspecific GR-Gas5\_RNA\_model2 interactions.

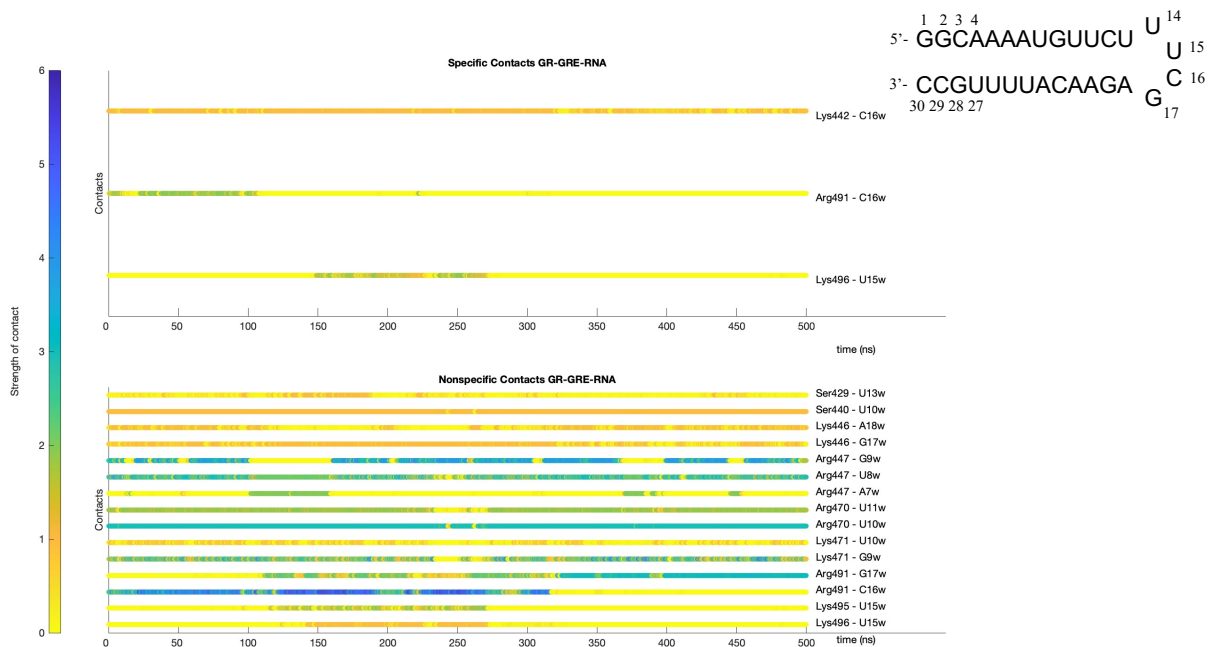

**Figure S9:** Dynamic contacts map for the specific and nonspecific GR-GRE\_RNA interactions.

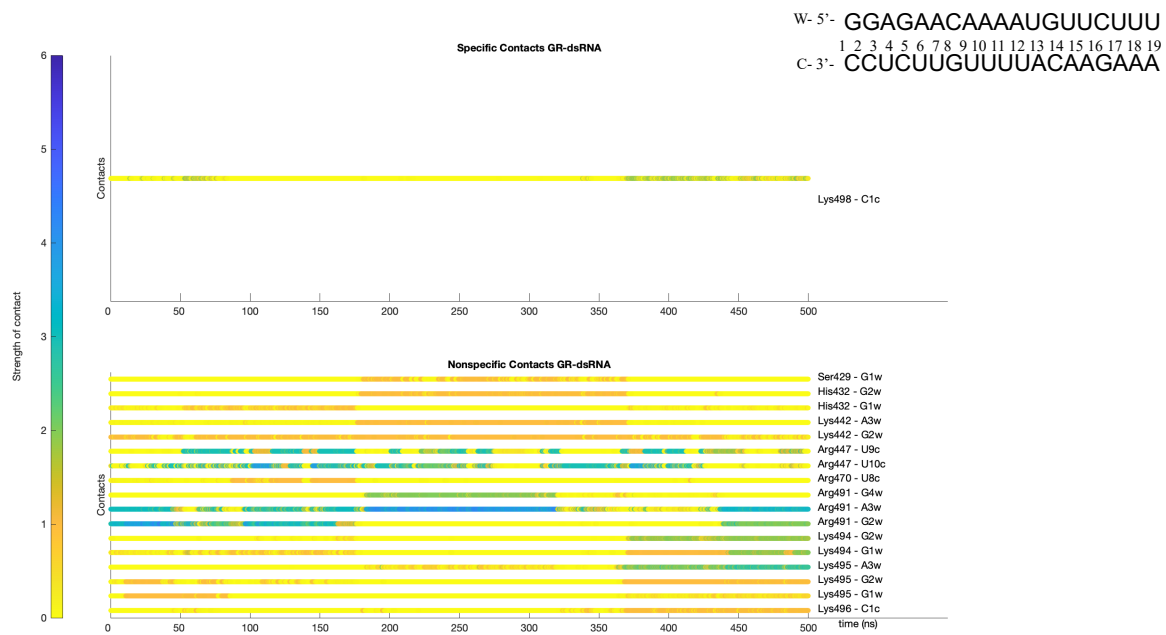

**Figure S10:** Dynamic contacts map for the specific and nonspecific GR-dsRNA interactions.

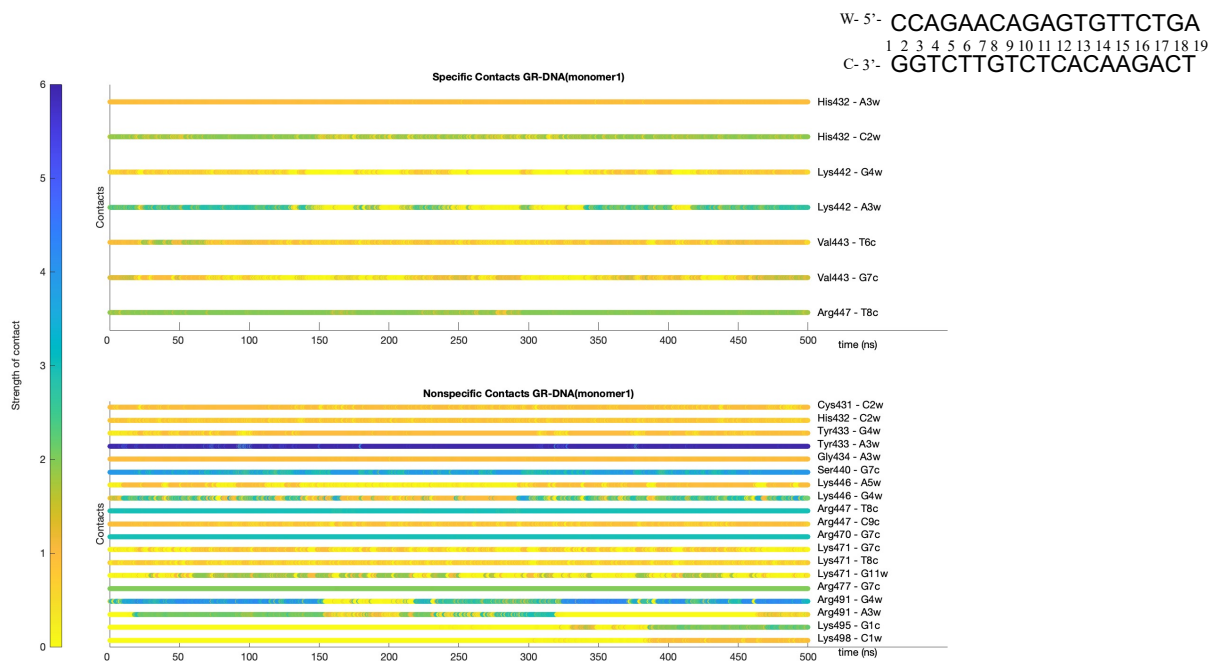

**Figure S11:** Dynamic contacts map for the specific and nonspecific GR(monmer1)-DNA interactions.

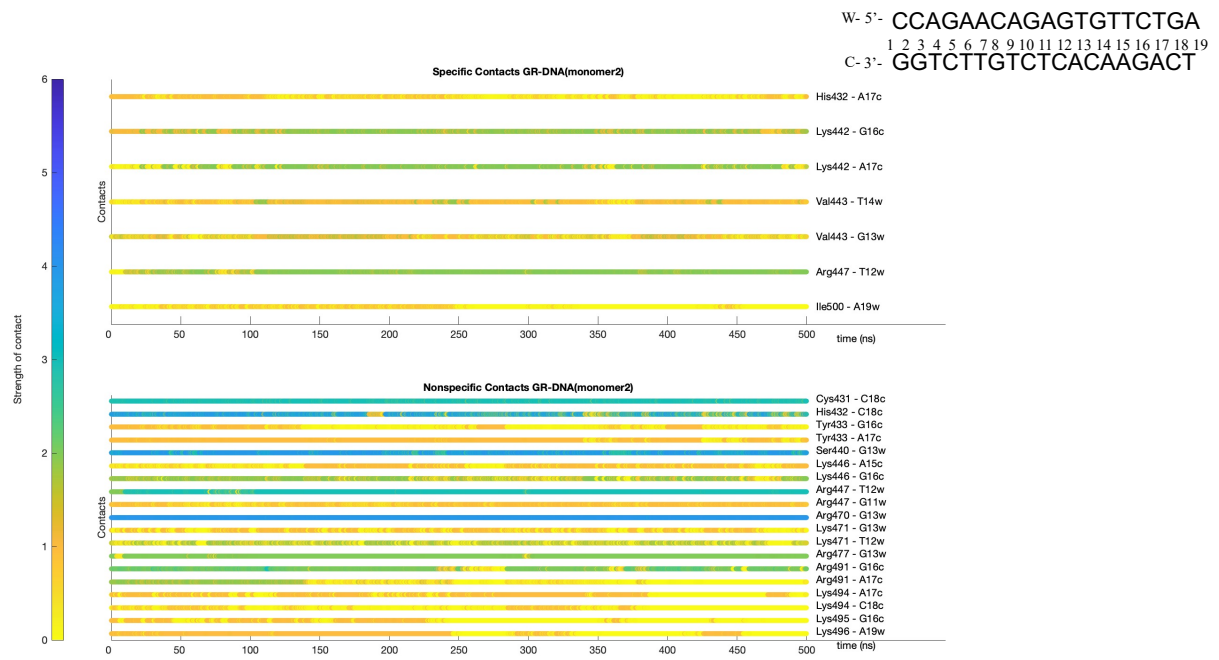

**Figure S12:** Dynamic contact map for the specific and nonspecific GR(monomer2)-DNA interactions.



**A**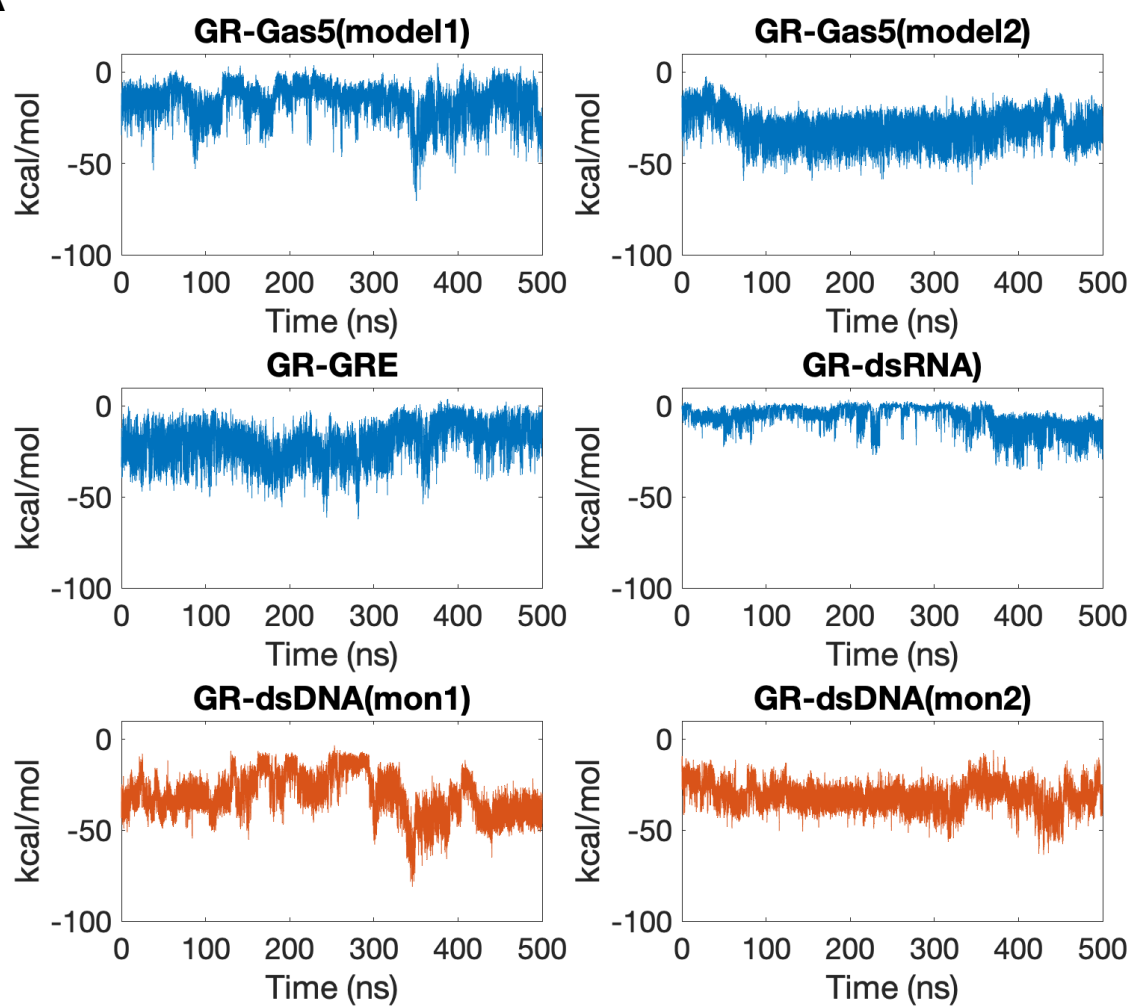

**B**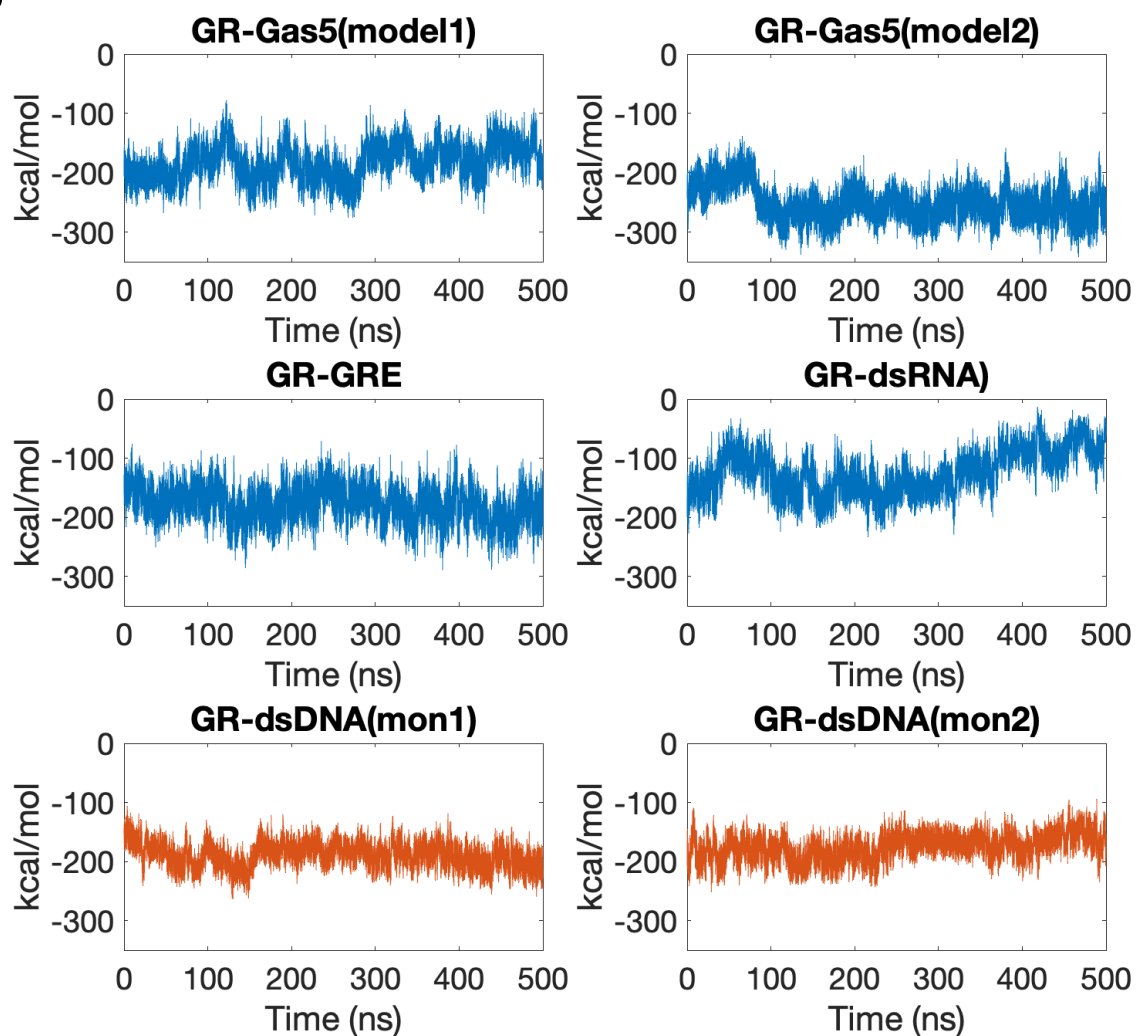

**Figure S13:** Specific (A) and nonspecific (B) GR-DNA/RNA interaction energies along the corresponding MD trajectories.

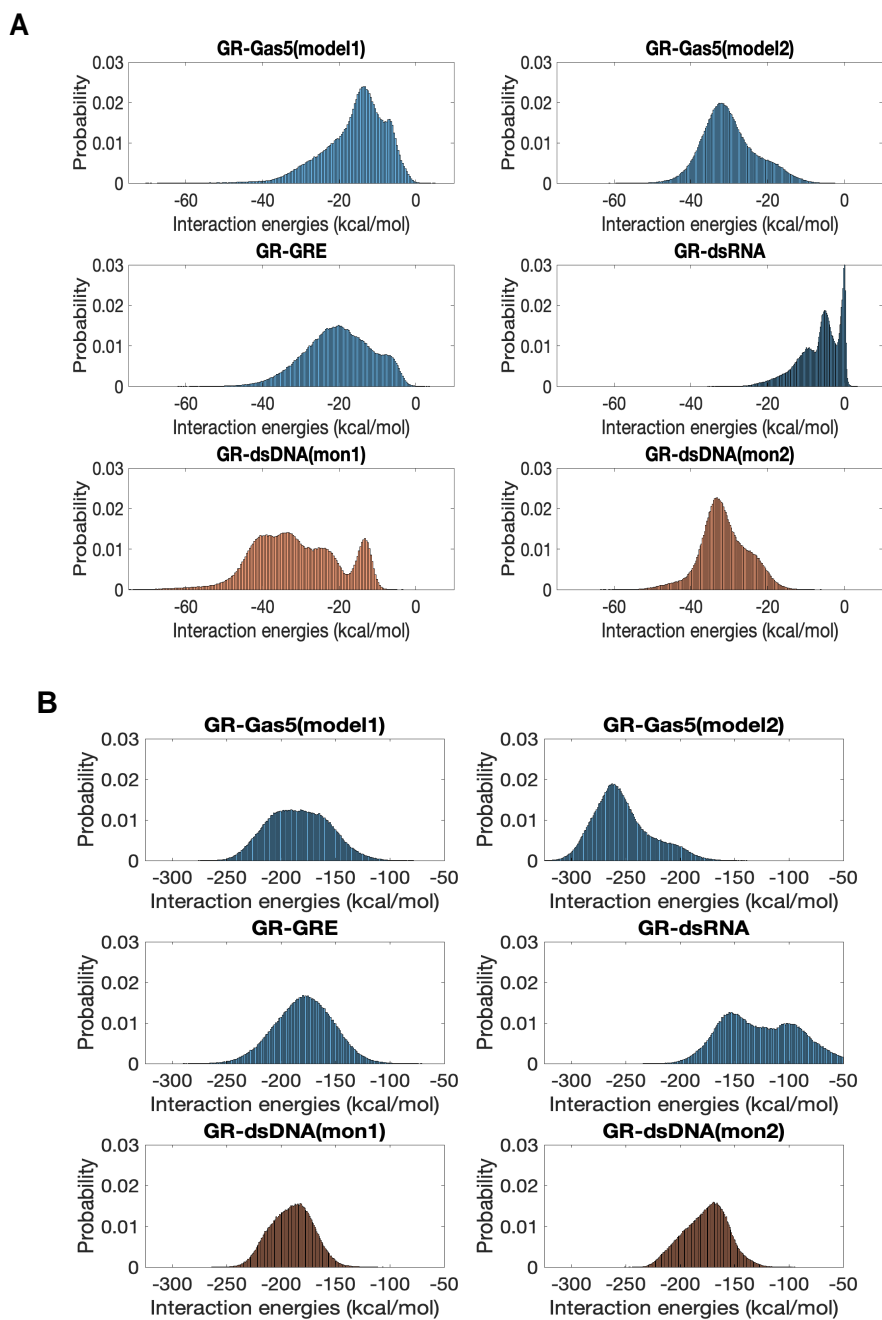

**Figure S14:** Specific (A) and nonspecific (B) GR-DNA/RNA interaction energies distributions

**Table S1.** Binding energies estimated by the MMPBSA and MMGBSA analyses for the GR-DNA/RNA complexes.

|                | MMPBSA (kcal/mol) | MMGBSA (kcal/mol) |
|----------------|-------------------|-------------------|
| GR-DNA         | -197.2±17.7       | -197.8±15.3       |
| GR(mon1)-DNA   | -99.8±14.0        | -101.6±13.1       |
| GR(mon2)-DNA   | -97.1±13.1        | -93.4±11.5        |
| GR-dsRNA       | -83.4±11.7        | -72.9±9.7         |
| GR-GRE_RNA     | -70.3±14.1        | -64.8±11.2        |
| GR-Gas5_model1 | -90.1±15.0        | -79.7±13.1        |
| GR-Gas5_model2 | -130±16.6         | -129.2±15.3       |

**Table S2.** Solvation energies estimated by the MMPBSA and MMGBSA analyses for the GR-DNA/RNA complexes.

|                | MMPBSA (kcal/mol) | MMGBSA (kcal/mol) |
|----------------|-------------------|-------------------|
| GR-DNA         | 8083.3±189.4      | 8082.7±188.3      |
| GR(mon1)-DNA   | 4034.1±161.0      | 4032.2±159.7      |
| GR(mon2)-DNA   | 4049.6±157.5      | 4053.1±157.0      |
| GR-dsRNA       | 3877.3±193.7      | 3887.9±196.1      |
| GR-GRE_RNA     | 3737.4±181.9      | 3743.0±181.6      |
| GR-Gas5_model1 | 3896.3±225.9      | 3906.7±225.4      |
| GR-Gas5_model2 | 4327.9±158.9      | 4328.5±159.5      |

**Table S3.** The polar and non-polar terms of the solvation energy calculated by the MMPBSA and MMGBSA analyses. The polar term represents the electrostatic interactions between the solute and the solvent continuum model. The non-polar term represents the hydrophobic effects and is estimated by a linear relation to the SASA.

|                                 | MMPBSA (kcal/mol) | MMGBSA (kcal/mol) |
|---------------------------------|-------------------|-------------------|
| GR-DNA <b>polar</b>             | 8101.8±189.8      | 8101.2±188.7      |
| GR-DNA <b>non-polar</b>         | -18.5±1.2         |                   |
| GR(mon1)-DNA <b>polar</b>       | 4043.2±161.9      | 4041.4±160.6      |
| GR(mon1)-DNA <b>non-polar</b>   | -9.1±1.4          |                   |
| GR(mon2)-DNA <b>polar</b>       | 4059.0±157.9      | 4062.5±157.5      |
| GR(mon2)-DNA <b>non-polar</b>   | -9.4±0.8          |                   |
| GR-dsRNA <b>polar</b>           | 3882.9±193.9      | 3893.5±196.2      |
| GR-dsRNA <b>non-polar</b>       | -5.6±0.7          |                   |
| GR-GRE_RNA <b>polar</b>         | 3744.4±182.2      | 3750.0±181.9      |
| GR-GRE_RNA <b>non-polar</b>     | -7.0±0.8          |                   |
| GR-Gas5_model1 <b>polar</b>     | 3904.7±226.2      | 3915.1±225.6      |
| GR-Gas5_model1 <b>non-polar</b> | -8.38±0.9         |                   |
| GR-Gas5_model2 <b>polar</b>     | 4339.1±159.4      | 4339.76±160.0     |
| GR-Gas5_model2 <b>non-polar</b> | -11.3±0.8         |                   |

**A**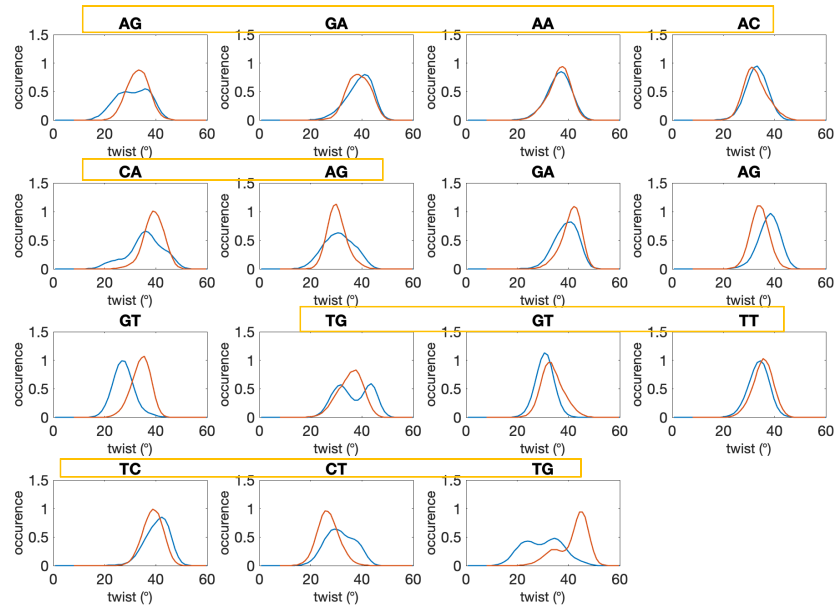**B**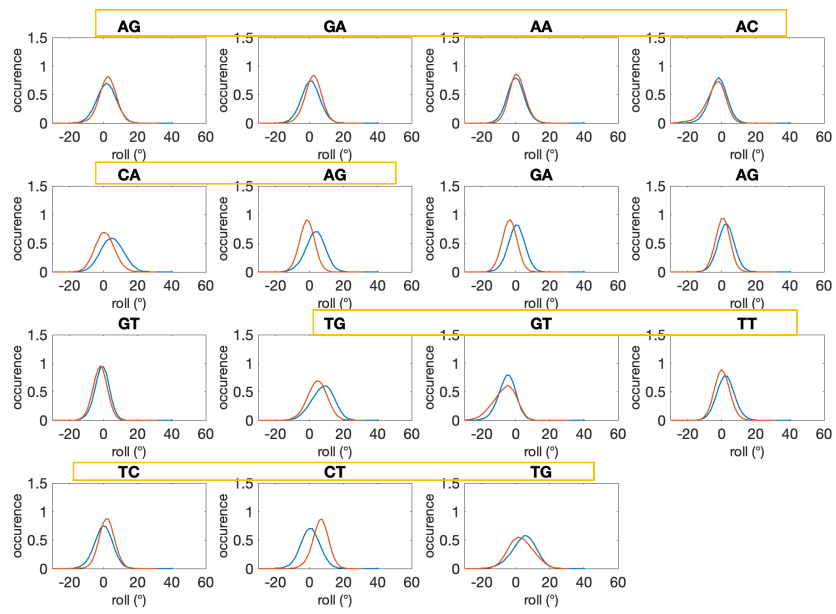

**C**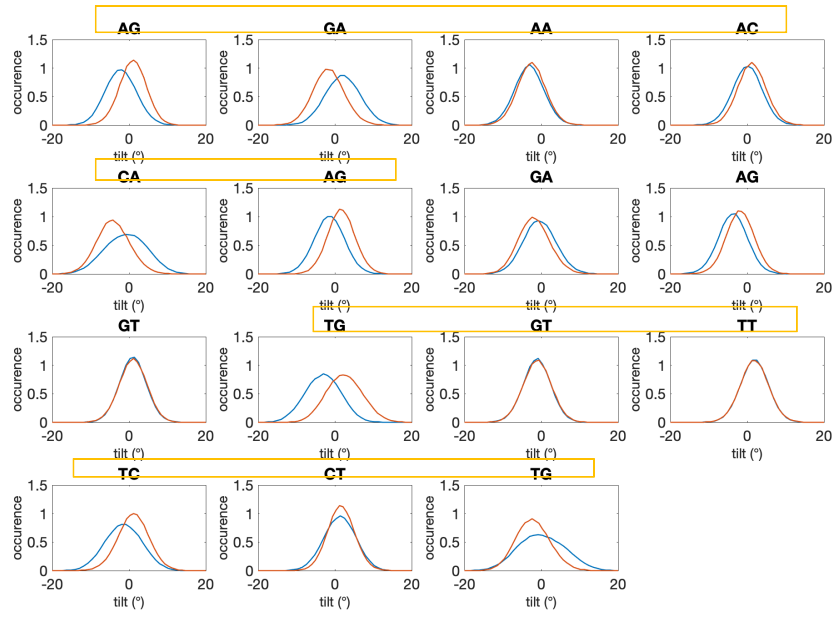**D**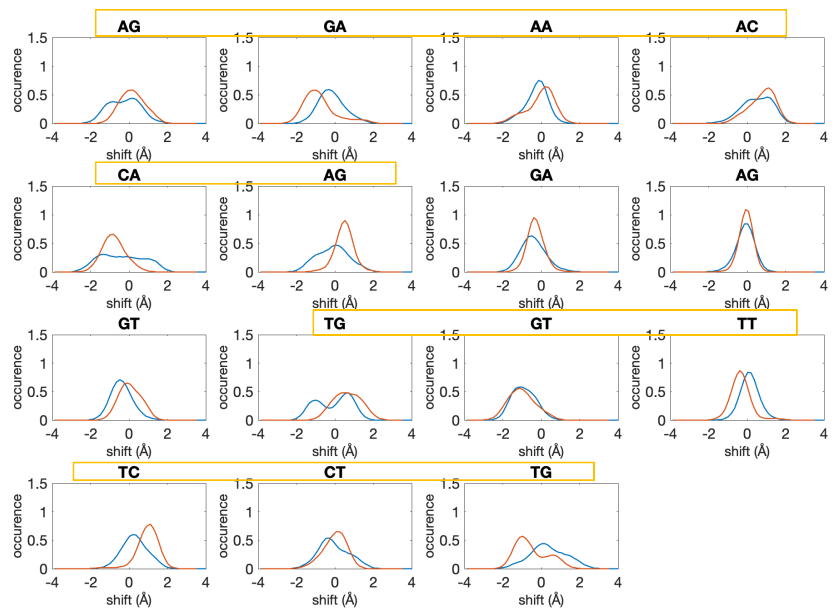

**E**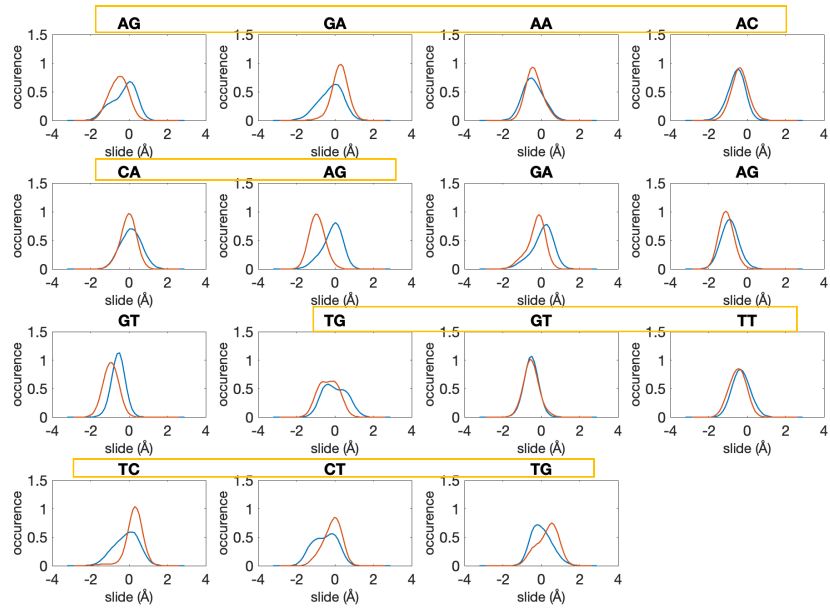**F**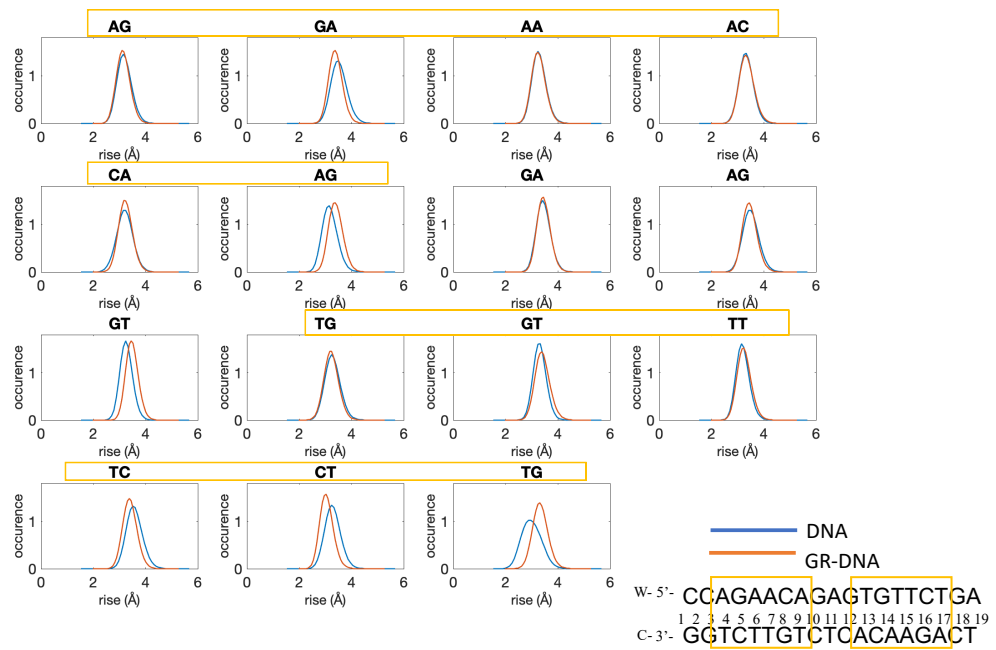

**Figure S15:** Helical parameters distributions for unbound and GR-bound DNA. **A.** Twist **B.** Roll **C.** Tilt **D.** Shift **E.** Slide **F.** Rise. The glucocorticoid receptor response elements 1 and 2 are highlighted with yellow.

**A**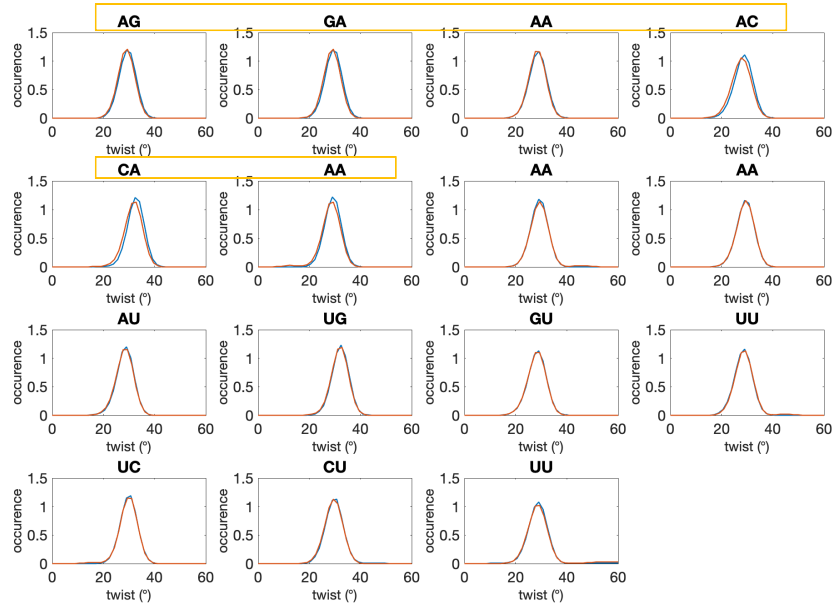**B**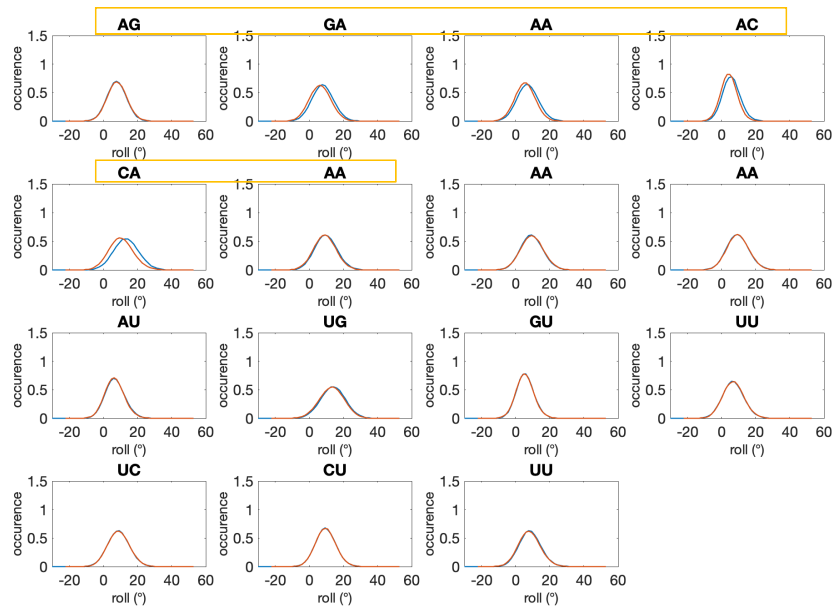



**C**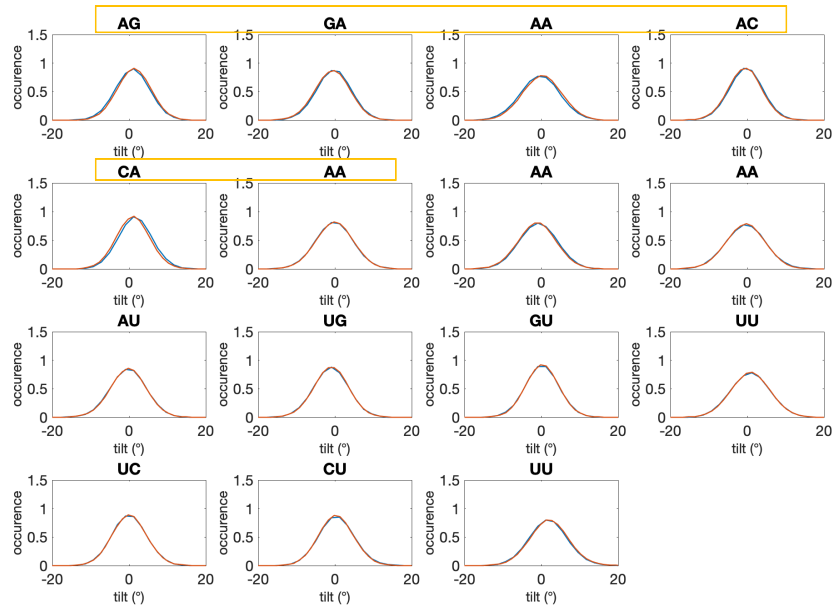**D**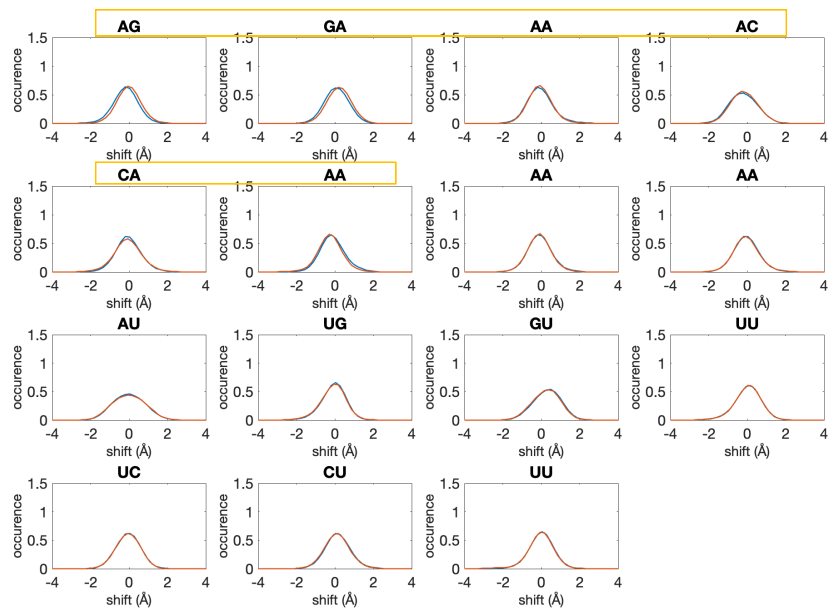

**E**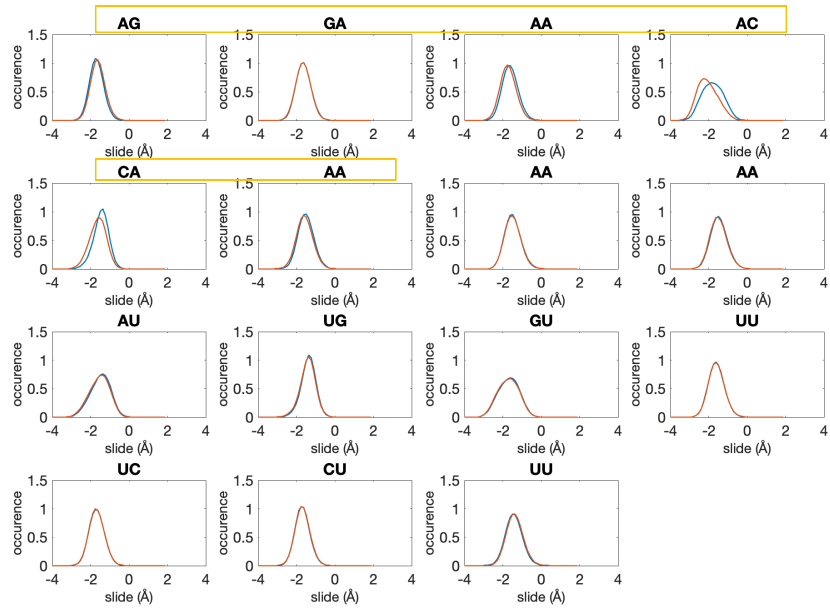**F**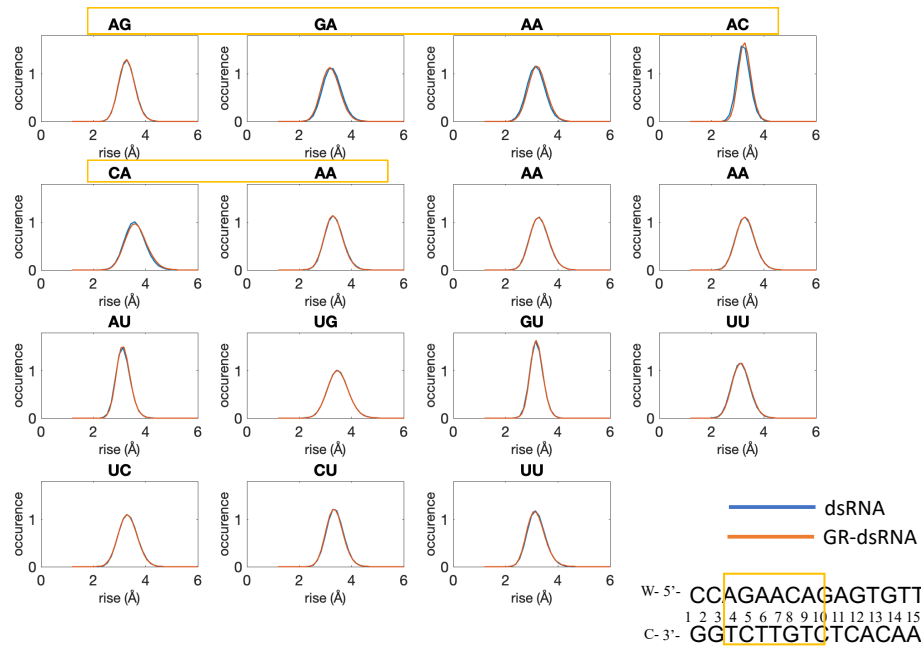

**Figure S16:** Helical parameters distributions for unbound and GR-bound dsRNA. **A.** Twist **B.** Roll **C.** Tilt **D.** Shift **E.** Slide **F.** Rise. The glucocorticoid receptor response element is highlighted with yellow.

**A**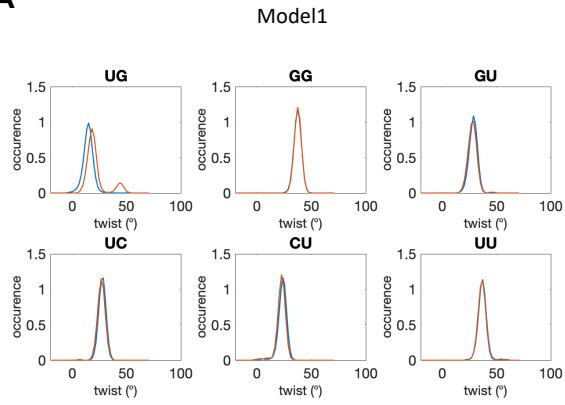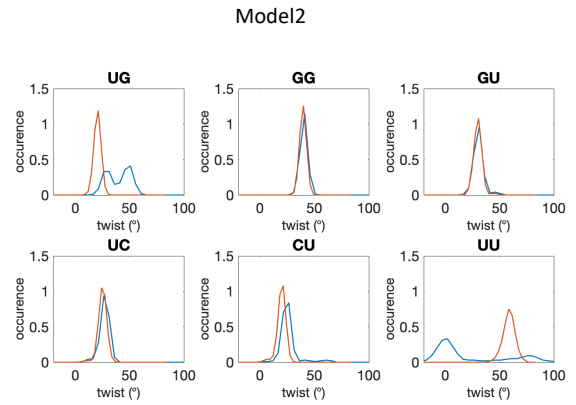**B**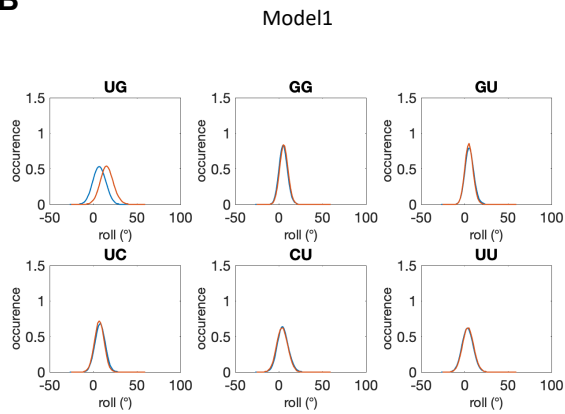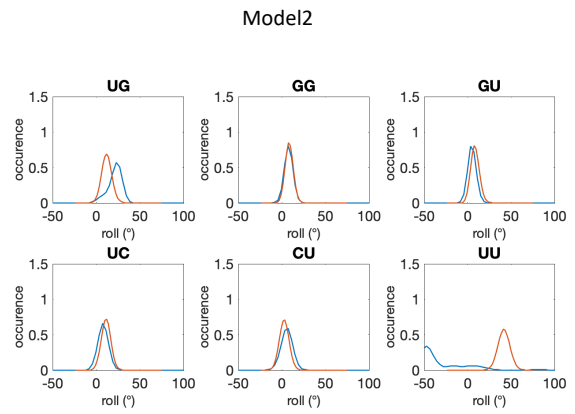**C**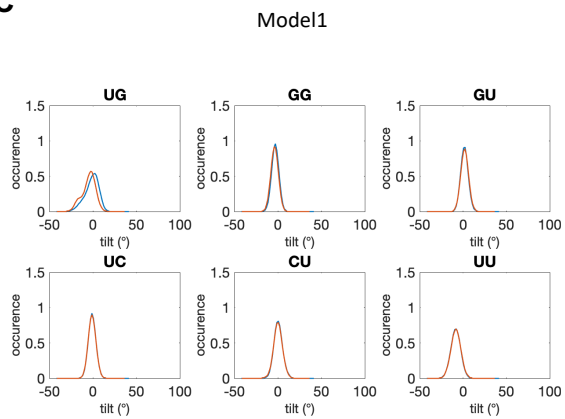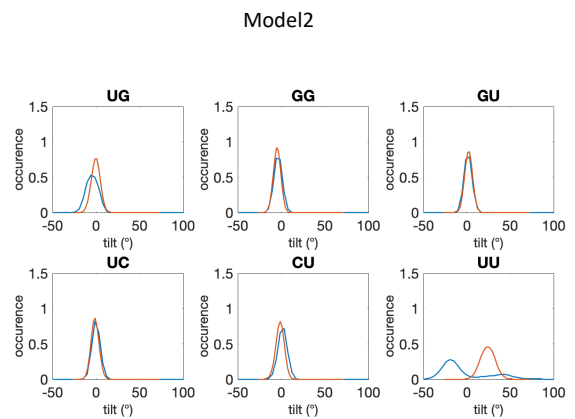**D**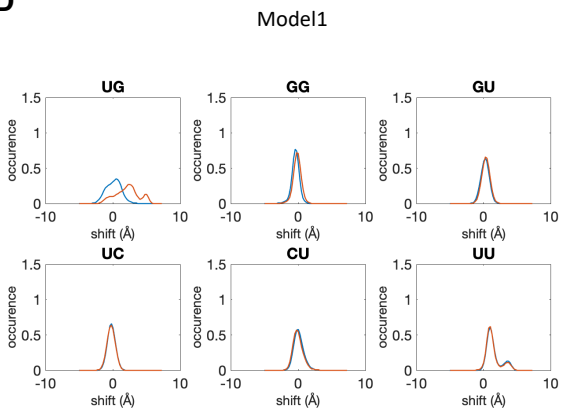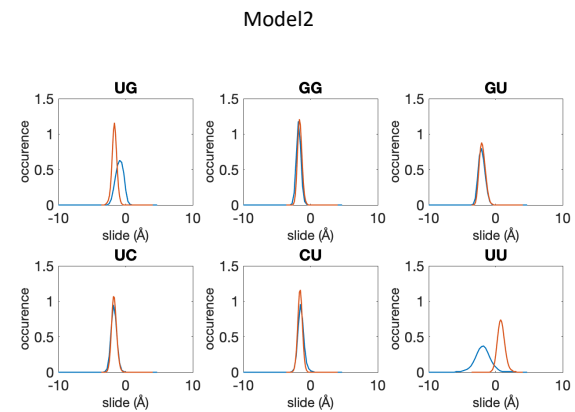

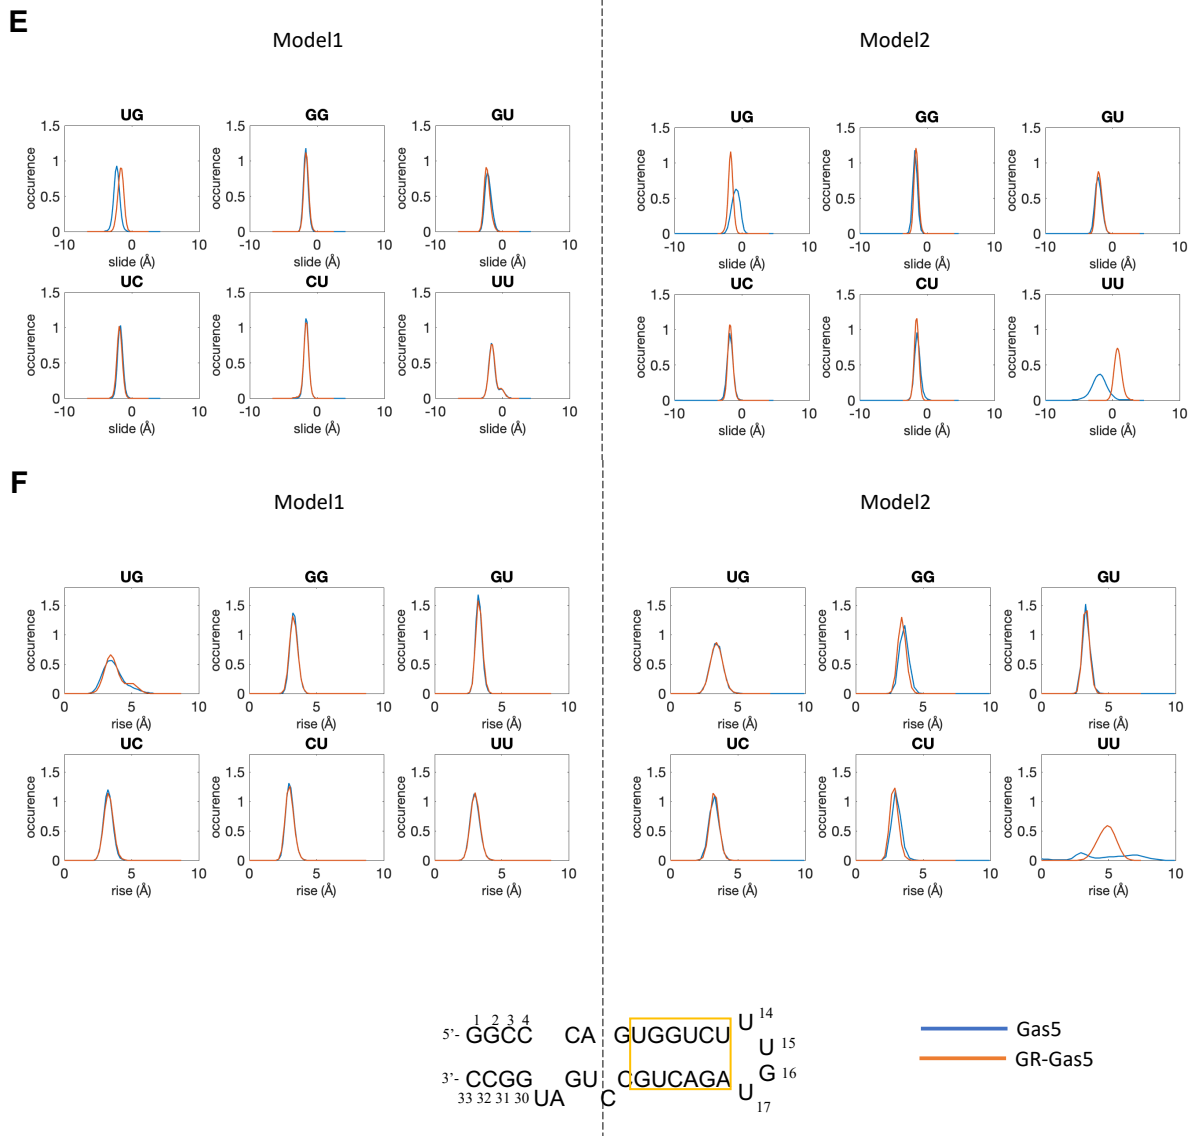

**Figure S17:** Helical parameters distributions of the glucocorticoid receptor response element for unbound and GR-bound Gas5\_RNA for model1 (left panels) and model2 (right panels) . **A.** Twist **B.** Roll **C.** Tilt **D.** Shift **E.** Slide **F.** Rise.

**A**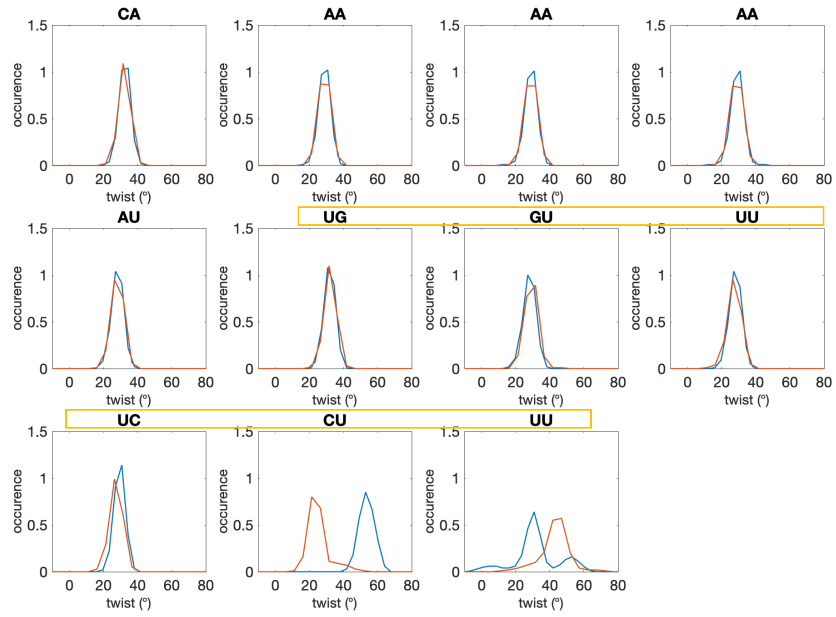**B**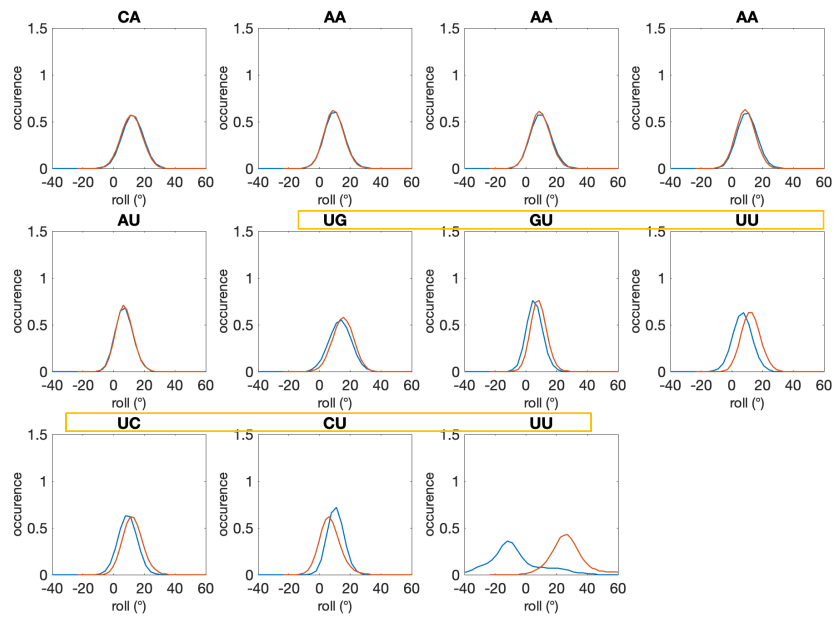

**C**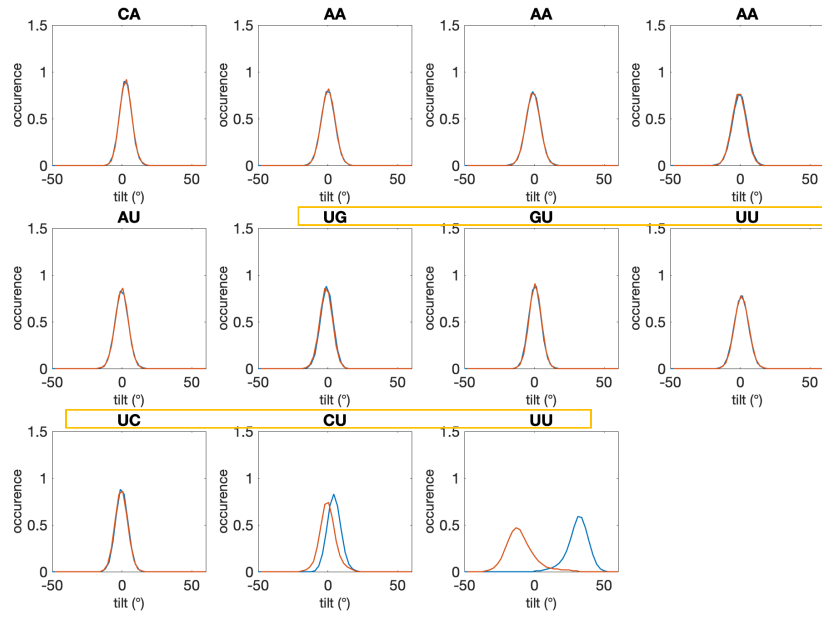**D**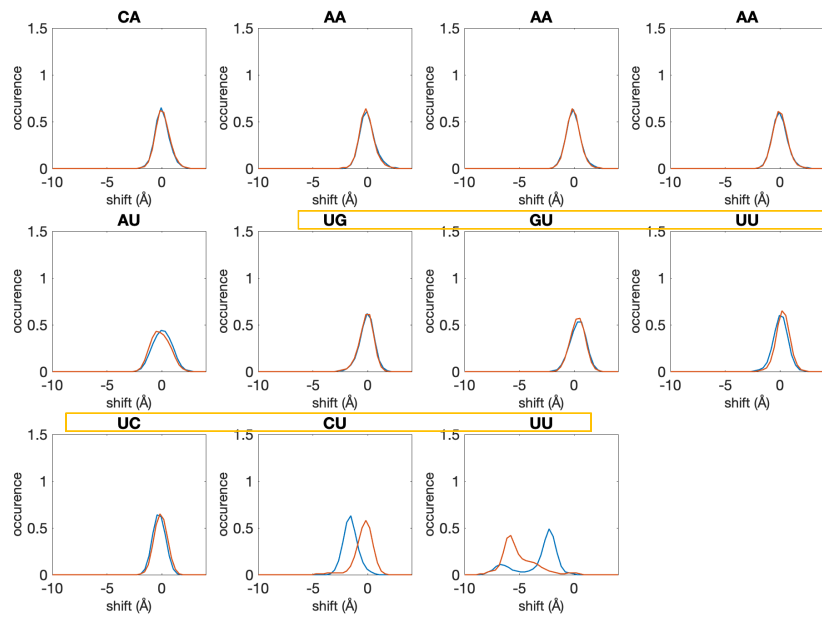

**E**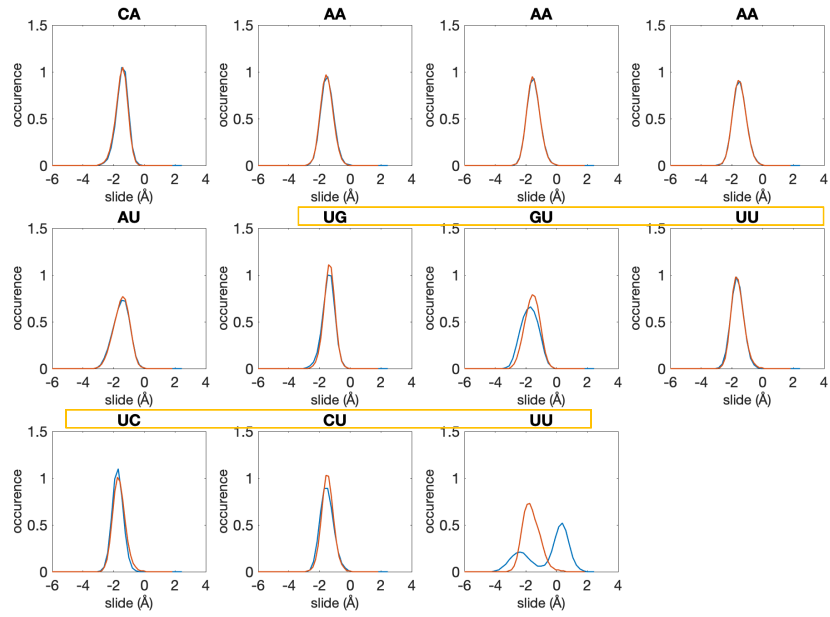**F**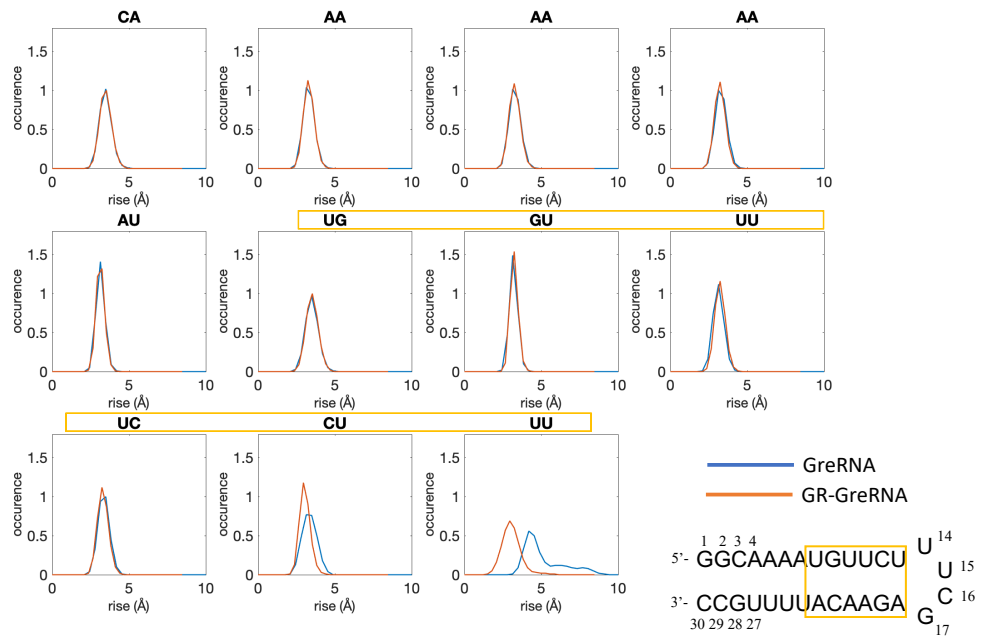

**Figure S18:** Helical parameters distributions for unbound and GR-bound GRE\_RNA. **A.** Twist **B.** Roll **C.** Tilt **D.** Shift **E.** Slide **F.** Rise. The glucocorticoid receptor response element is highlighted with yellow.

**A**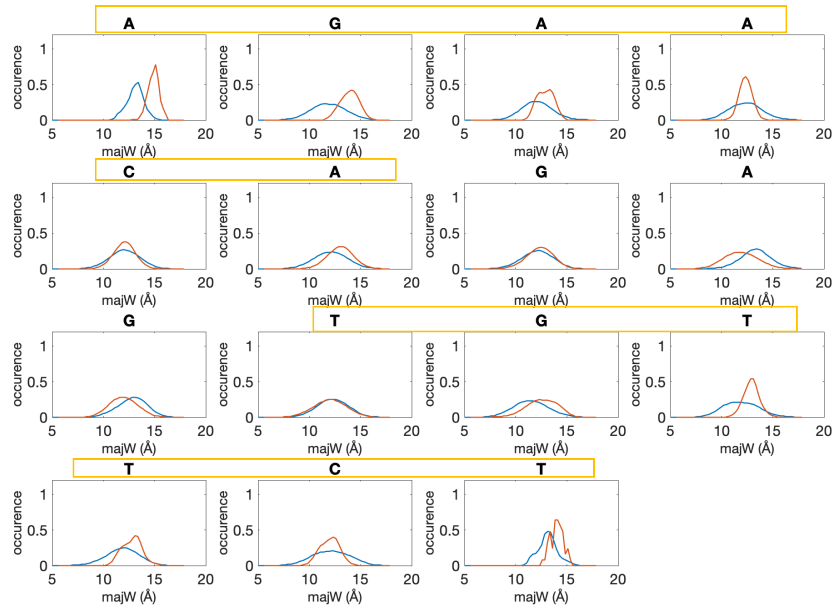**B**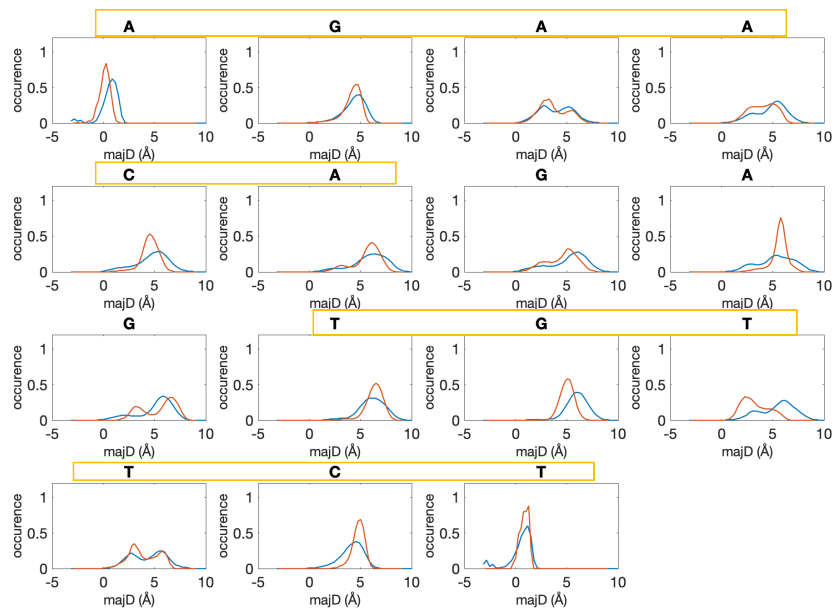



**C**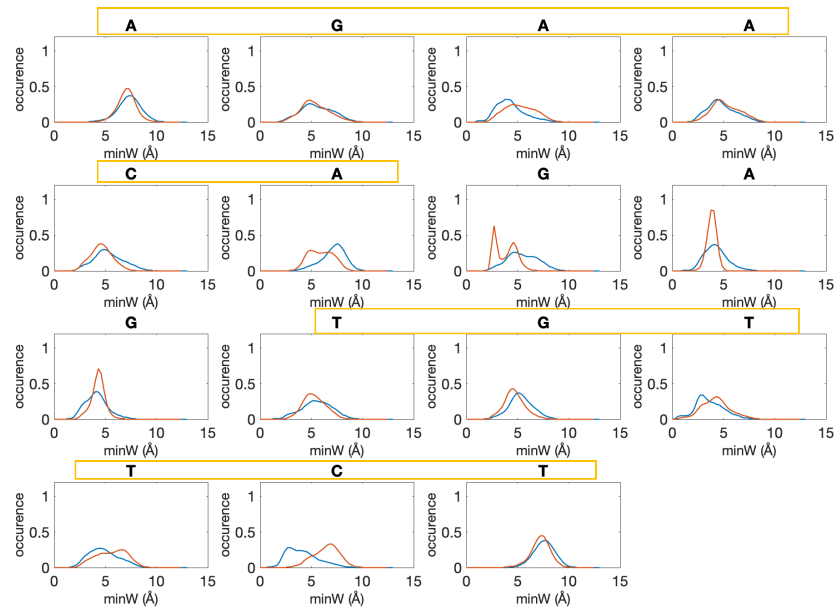**D**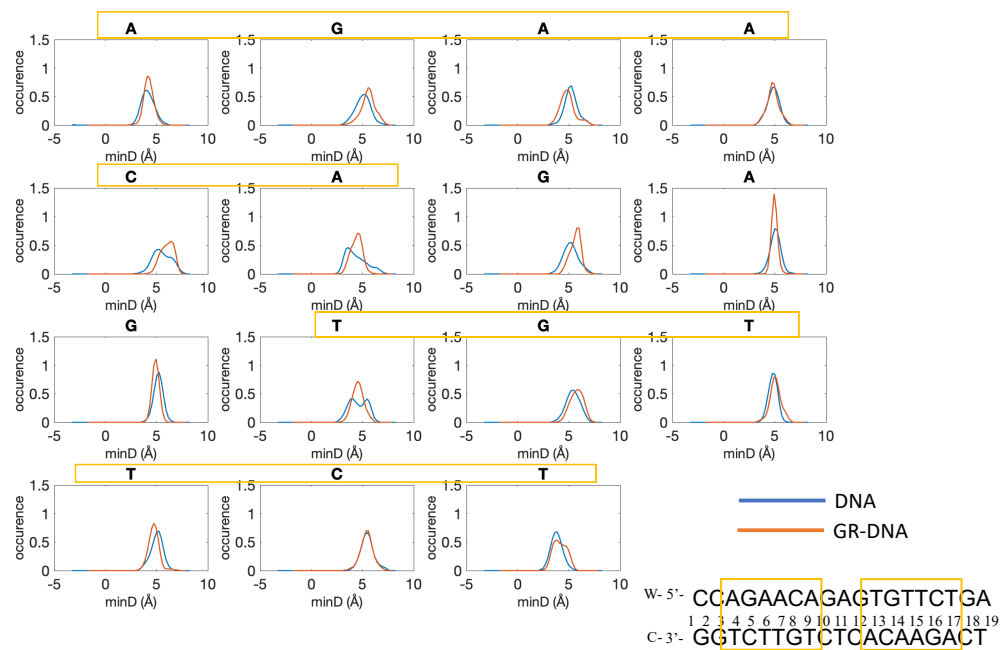

**Figure S19:** Groove parameters distributions for unbound and GR-bound DNA. **A.** Major groove width **B.** Major groove depth **C.** Minor groove width **D.** Minor groove depth. The glucocorticoid receptor response elements 1 and 2 are highlighted with yellow.

**A**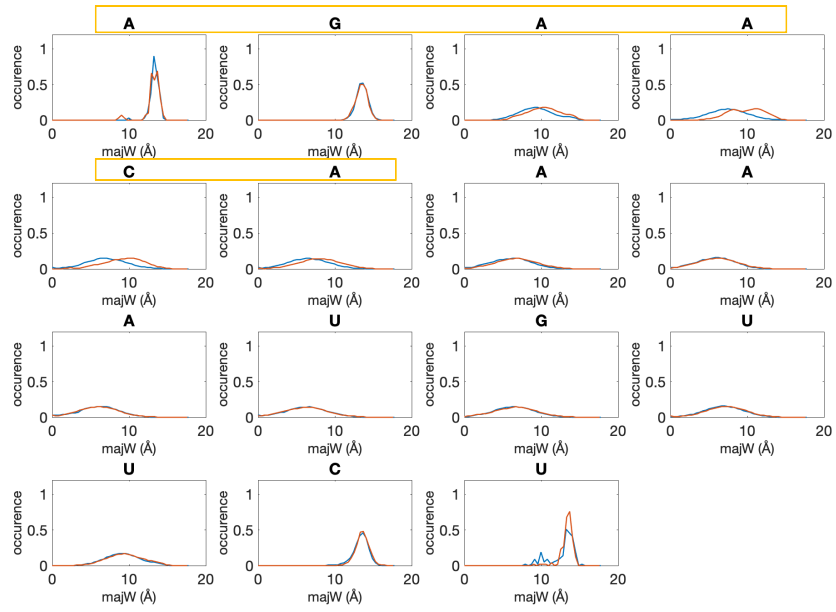**B**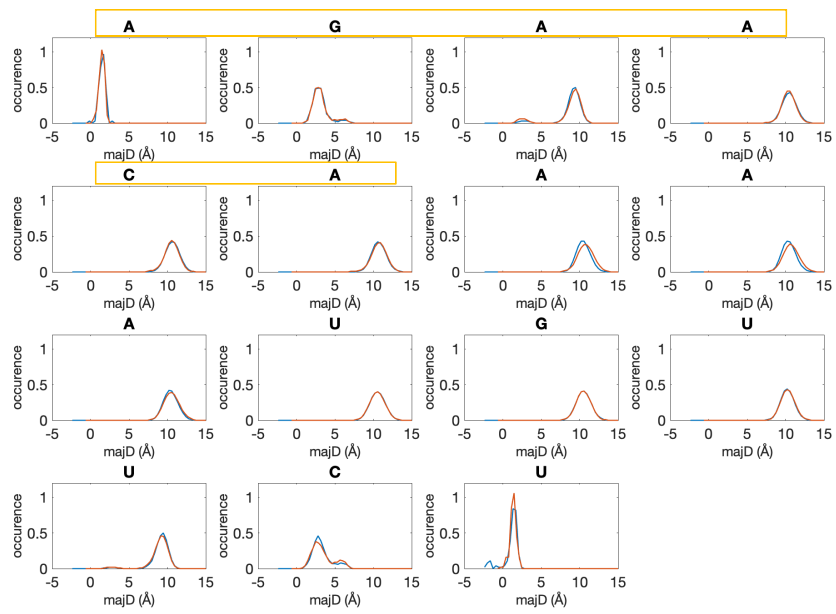

**C**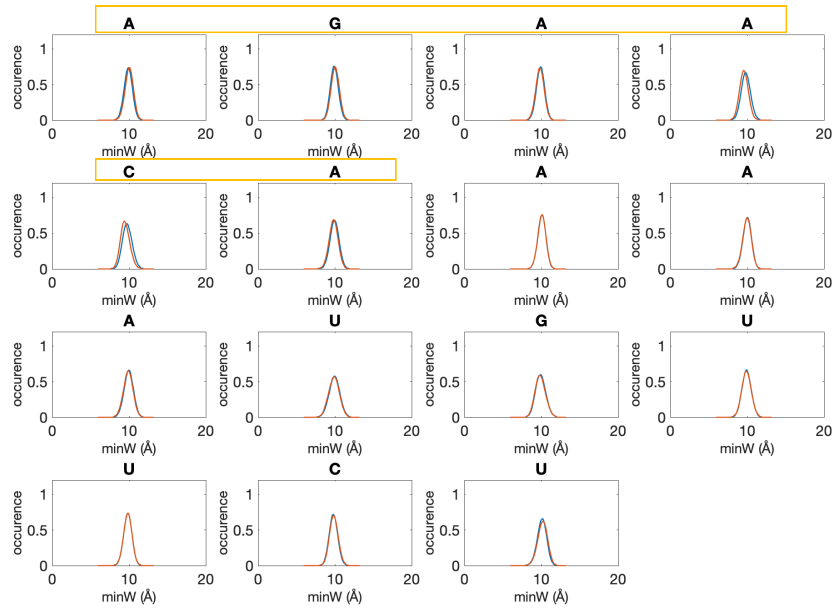**D**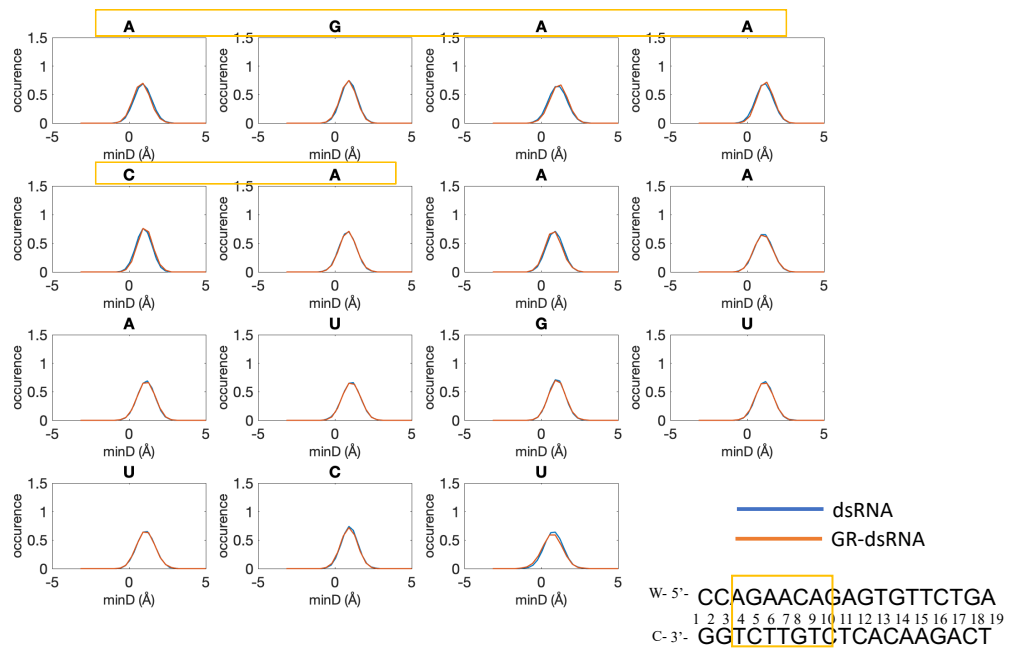

**Figure S20:** Groove parameters distributions for unbound and GR-bound dsRNA. **A.** Major groove width **B.** Major groove depth **C.** Minor groove width **D.** Minor groove depth. The glucocorticoid receptor response element is highlighted with yellow.

**A**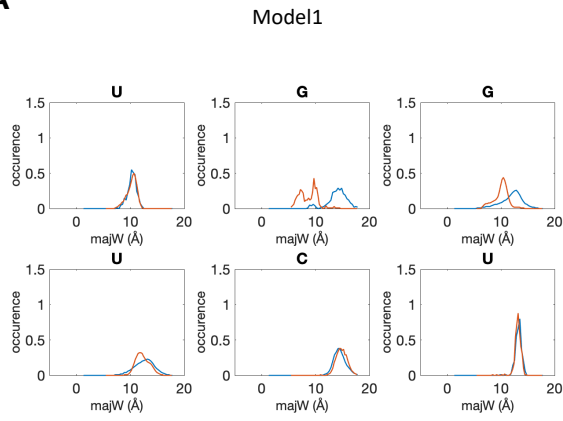**Model2**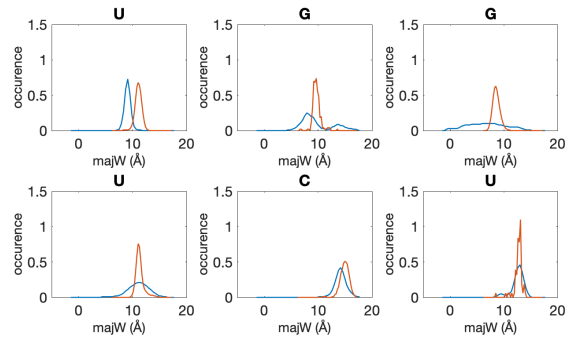**B**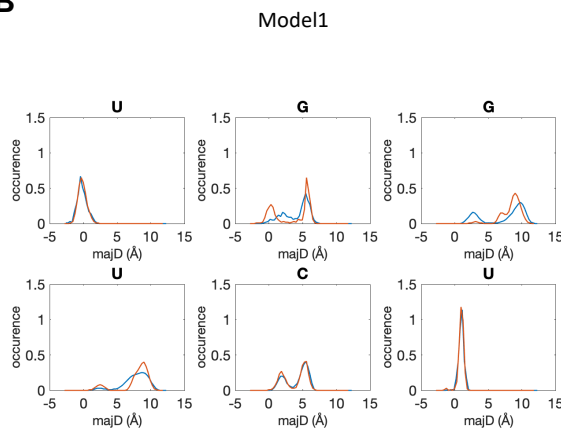**Model2**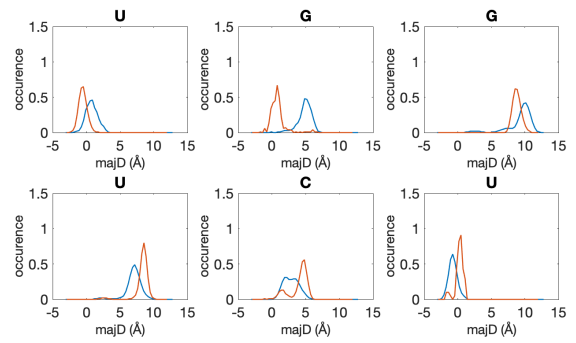**C**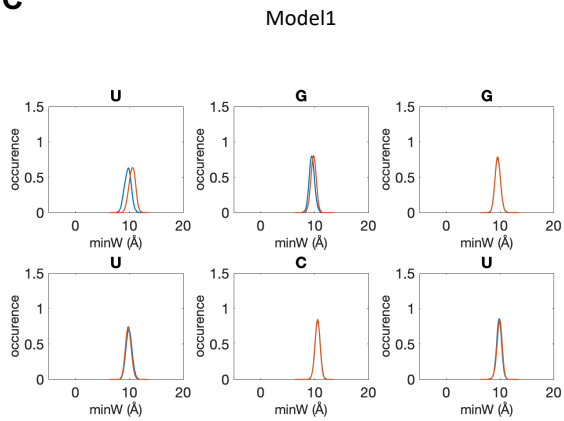**Model2**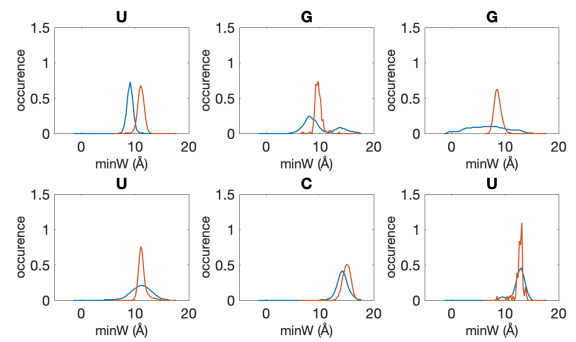

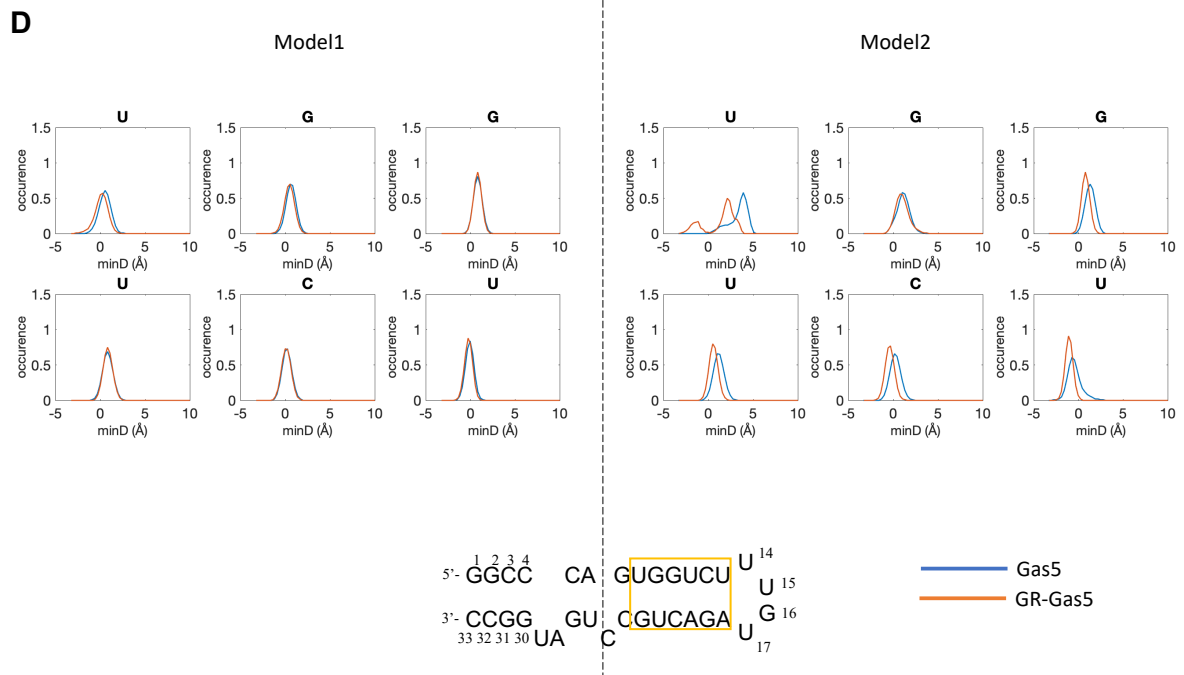

**Figure S21:** Groove parameters distributions of the glucocorticoid receptor response element for unbound and GR-bound Gas5\_RNA. **A.** Major groove width **B.** Major groove depth **C.** Minor groove width **D.**

**A**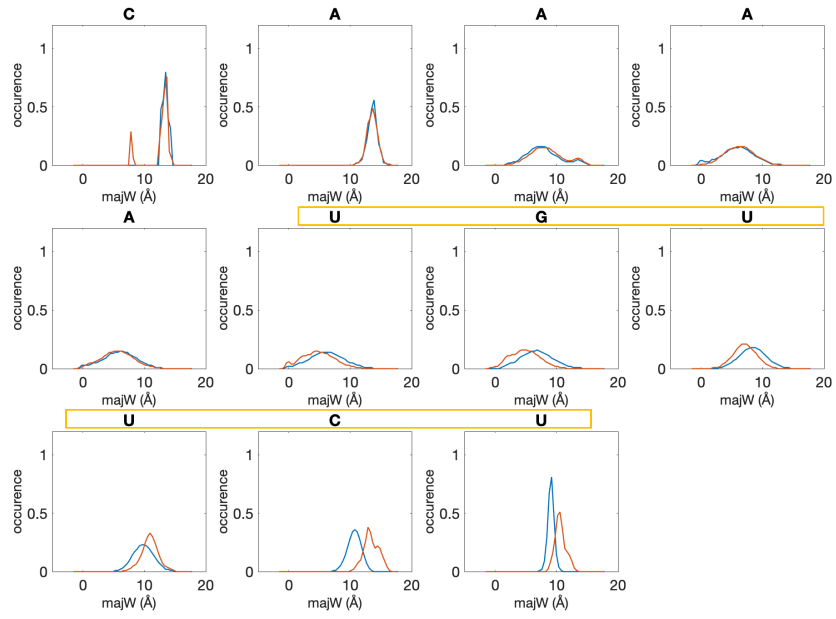**B**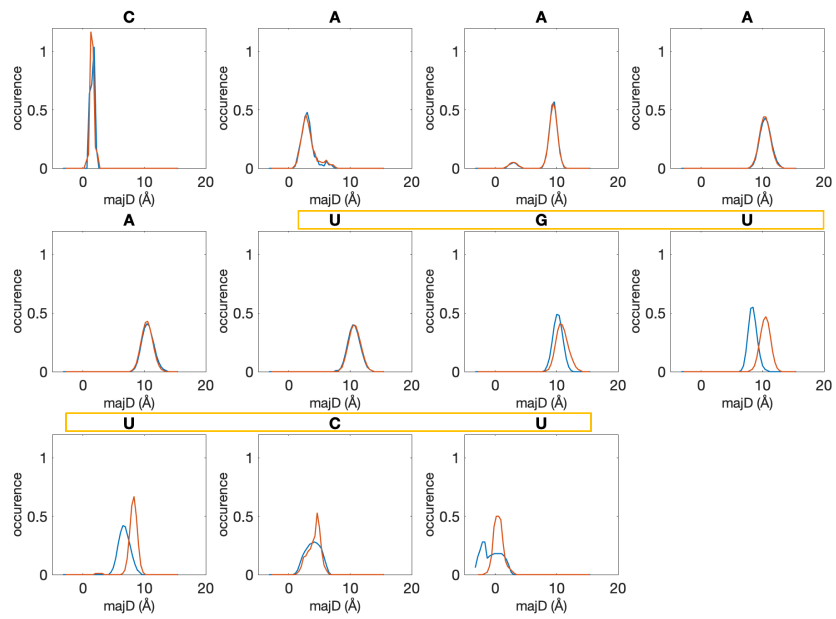

**C**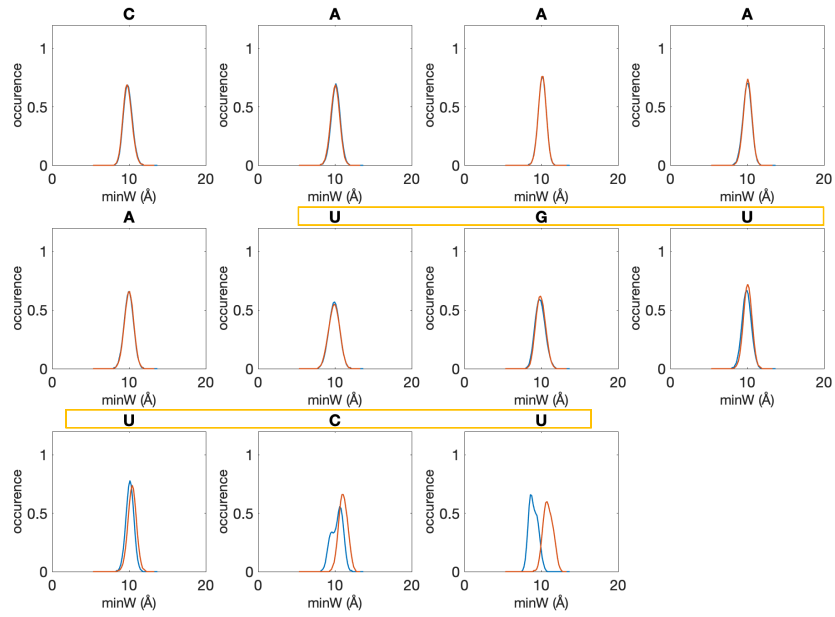**D**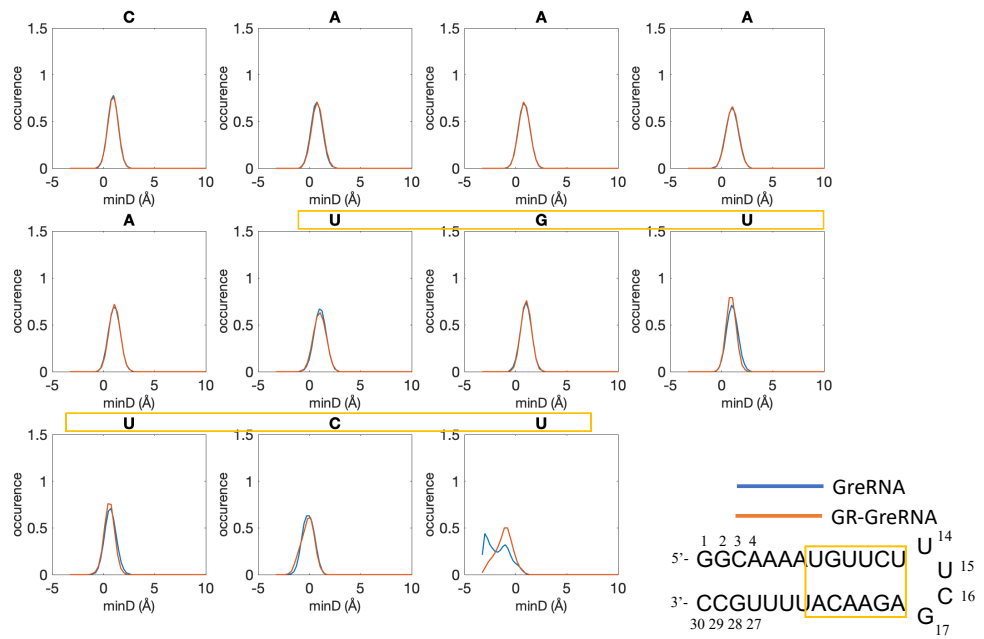

**Figure S22:** Groove parameters distributions for unbound and GR-bound GRE\_RNA. **A.** Major groove width **B.** Major groove depth **C.** Minor groove width **D.** Minor groove depth. The glucocorticoid receptor response element is highlighted with yellow.

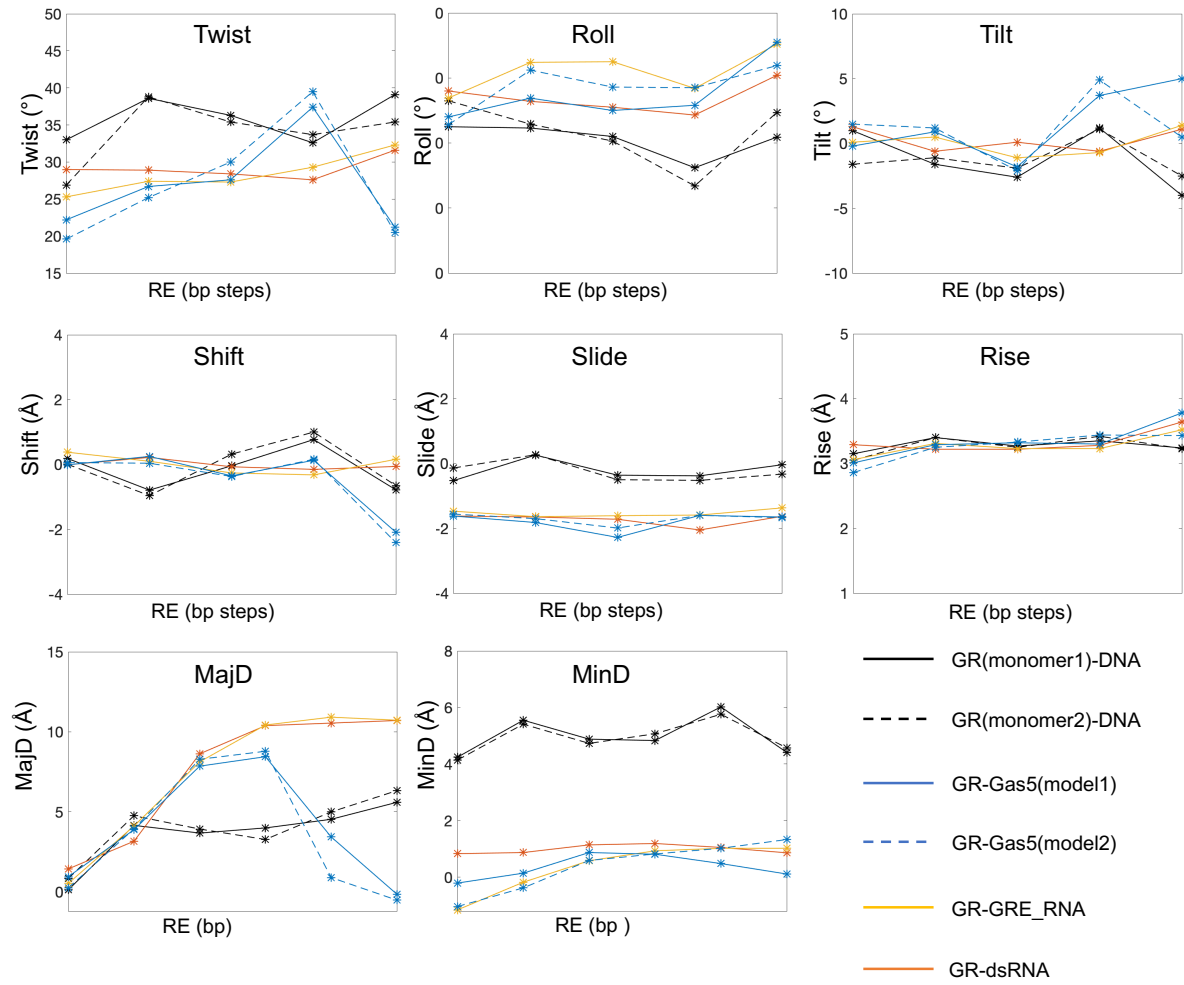

**Figure S23:** Comparison of average values for helical parameters and groove depths in different nucleic acids model systems for the b.p. within the GRE-site for the GR-bound systems.



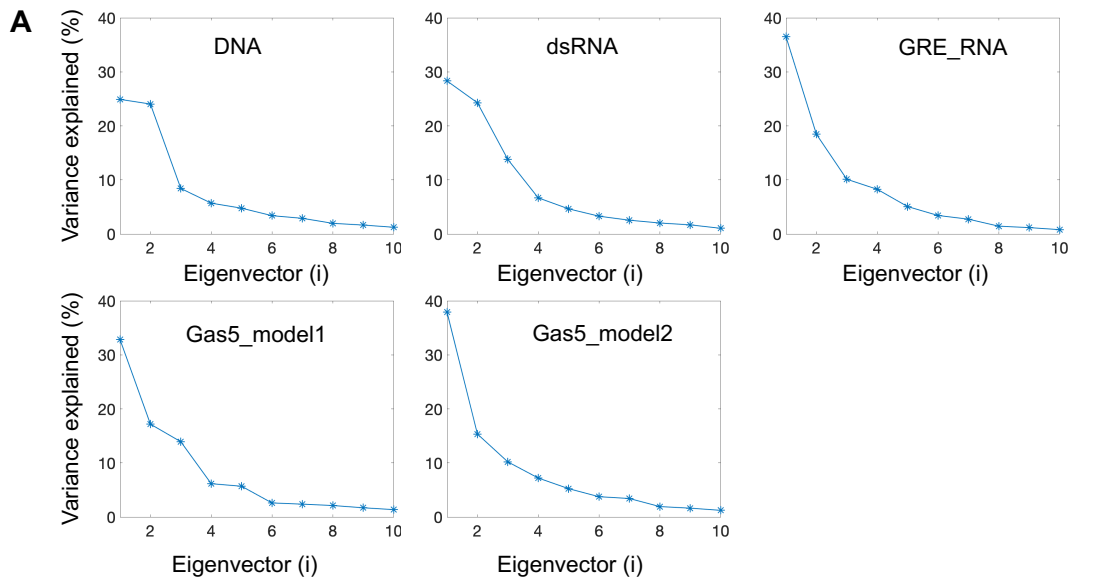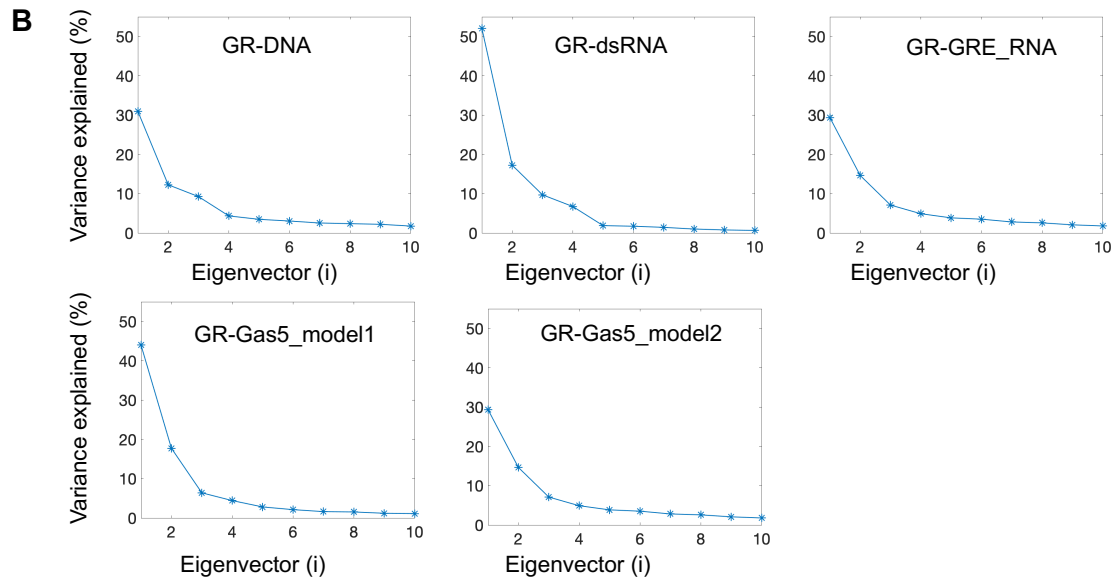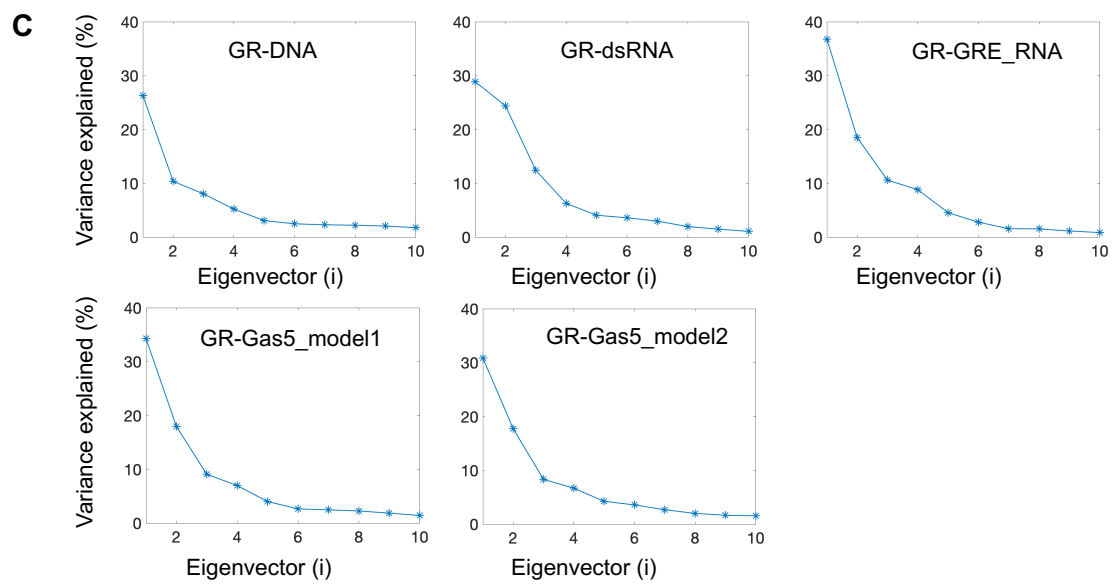

**Figure S24:** PCA analysis showing the variance explained by the first 10 eigenvectors. **A.** For unbound nucleic acids systems. For the GR-bound nucleic acids systems for the two PCA analyses performed: **B.** for the heavy atoms of the protein-DNA/RNA systems with the superposition on the nucleic acids and **C.** for heavy atoms of DNA/RNA with the superposition on the nucleic acids.

**Table S4:** Variance of the dynamics explained by the first three eigenvectors

|          | DNA   | dsRNA | GRE_RNA | Gas5_model1 | Gas5_model2 |
|----------|-------|-------|---------|-------------|-------------|
| Unbound  | 57.9% | 66.4% | 65.1%   | 64.0%       | 63.5%       |
| GR-bound |       |       |         |             |             |
| (1)      | 52.5% | 79.0% | 58.5%   | 68.2%       | 51.1%       |
| (2)      | 44.7% | 65.7% | 65.8%   | 61.3%       | 56.9%       |

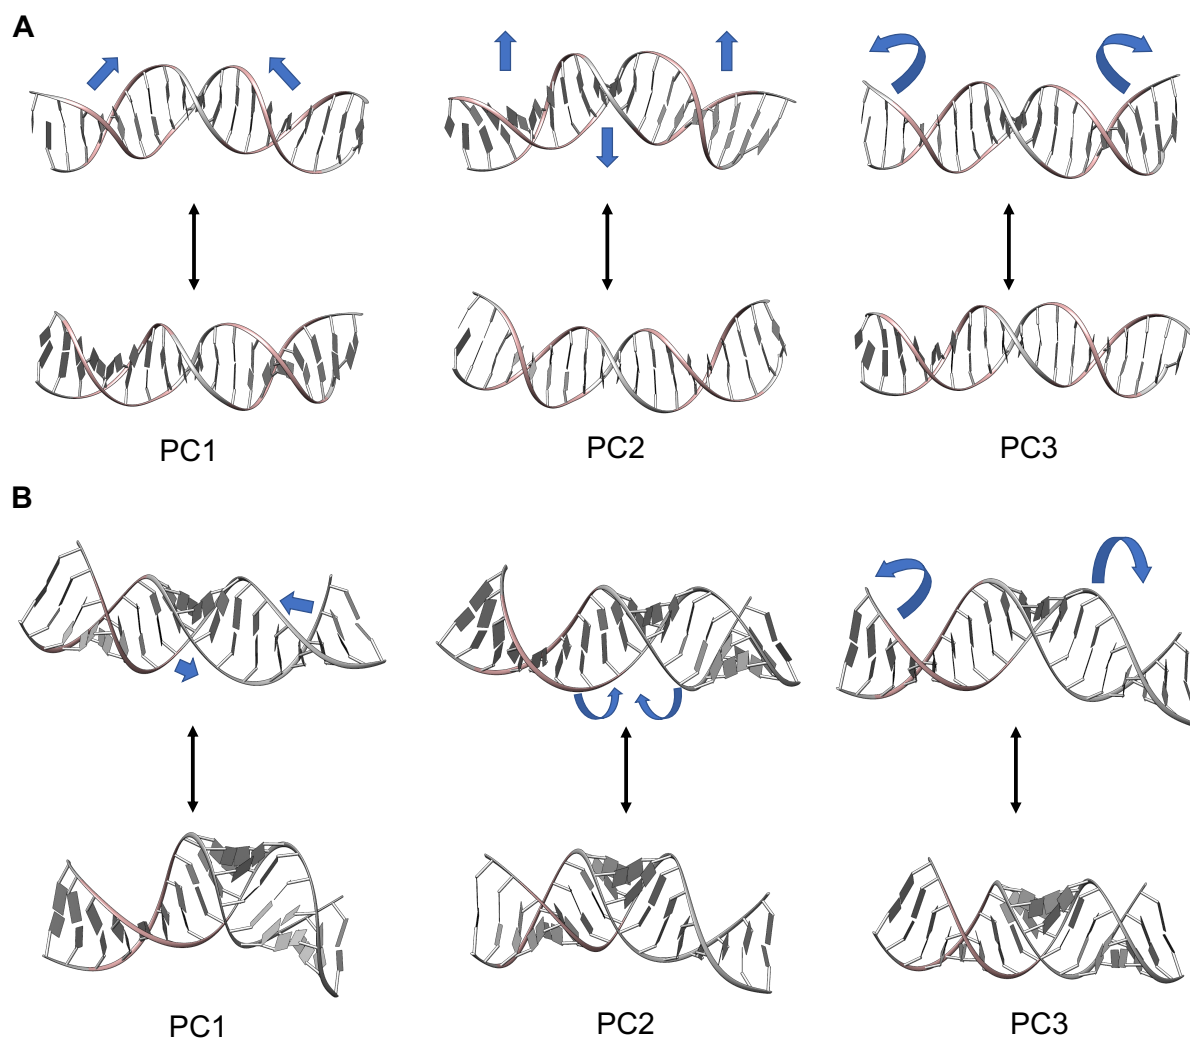

**C**

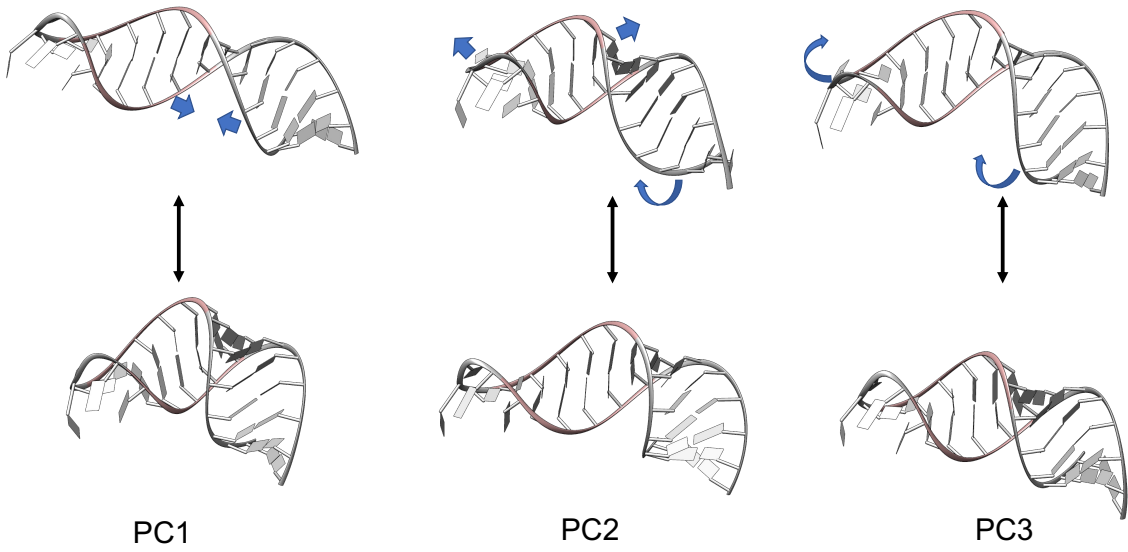

**D**

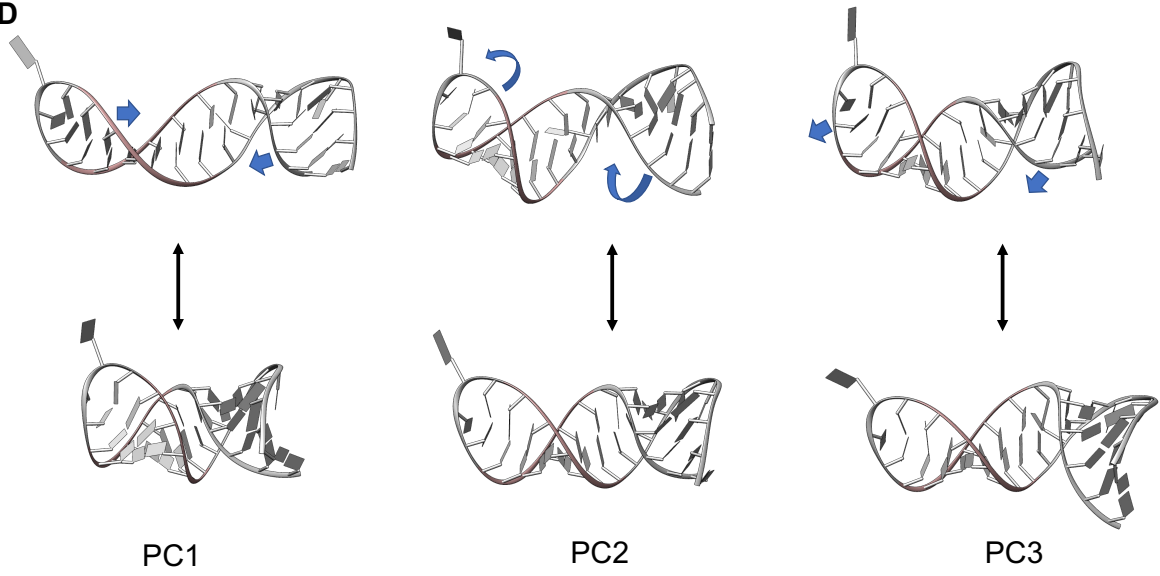

**E**

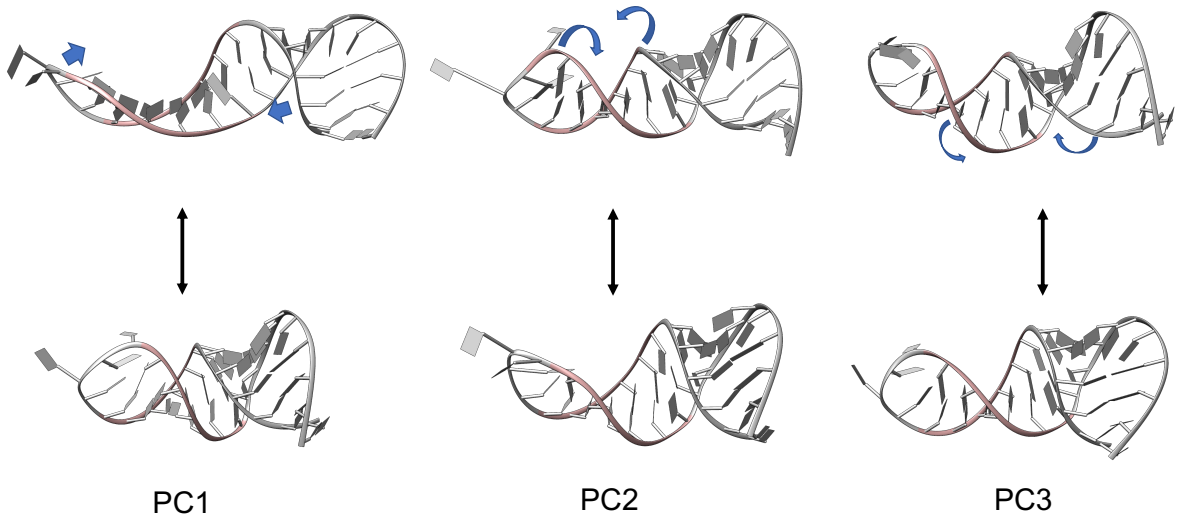

**Figure S25:** The extreme points for the first three PCs of the unbound nucleic acid systems. **A.** DNA **B.** dsRNA **C.** GRE\_RNA **D.** Gas5\_RNA\_model1 **E.** Gas5\_RNA\_model2. The blue arrows indicate the motion described by the corresponding PC.

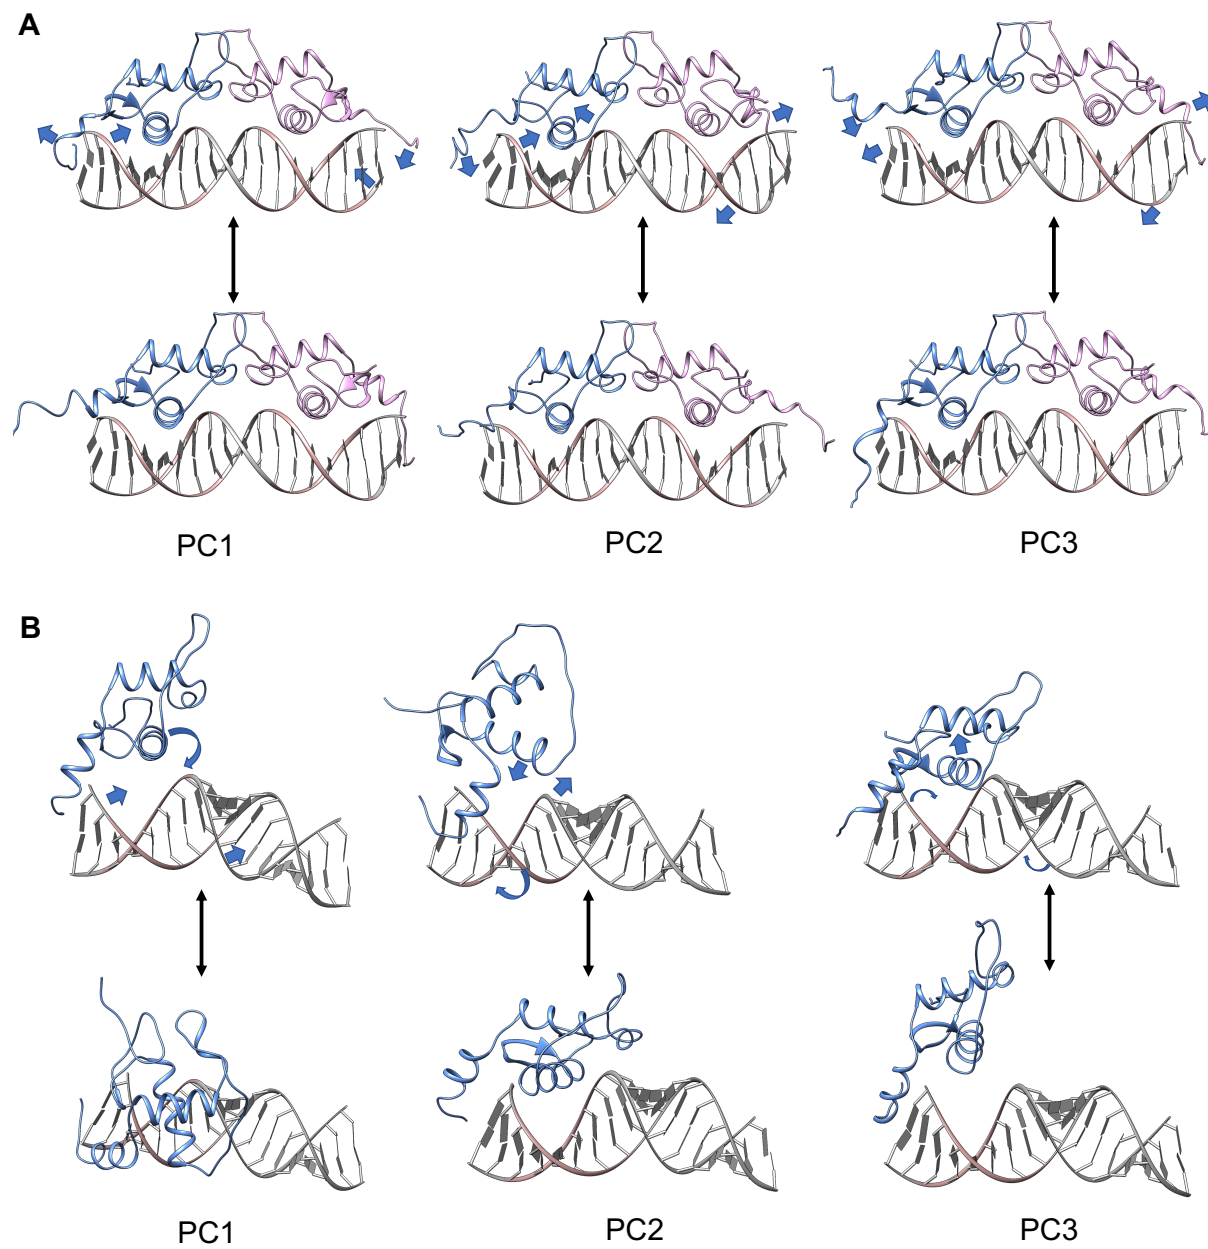

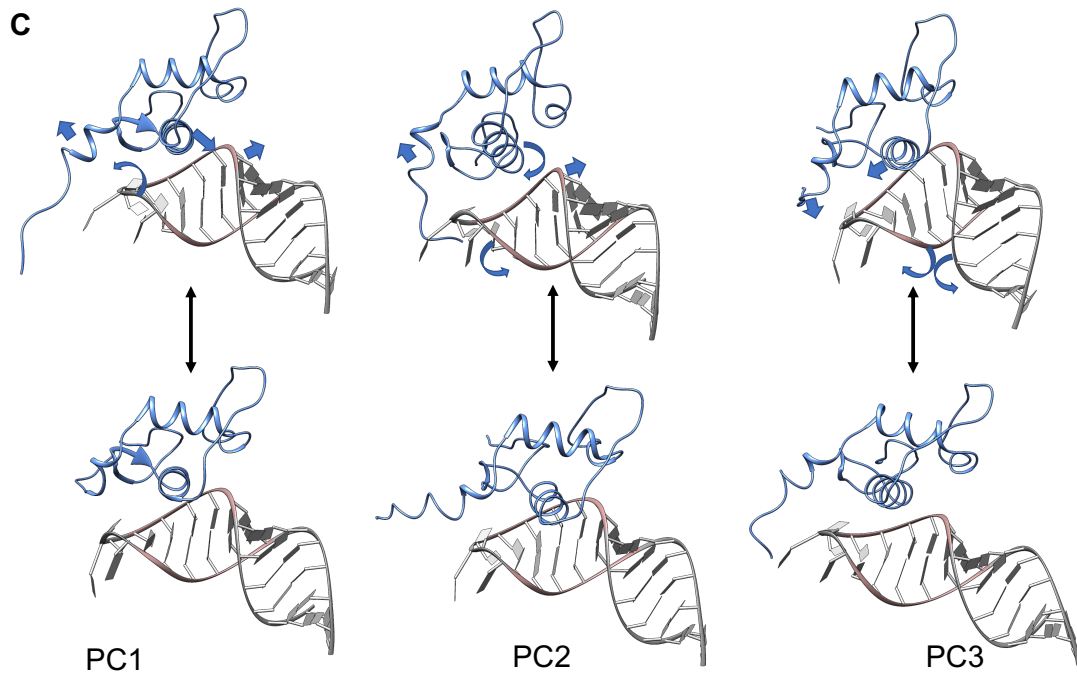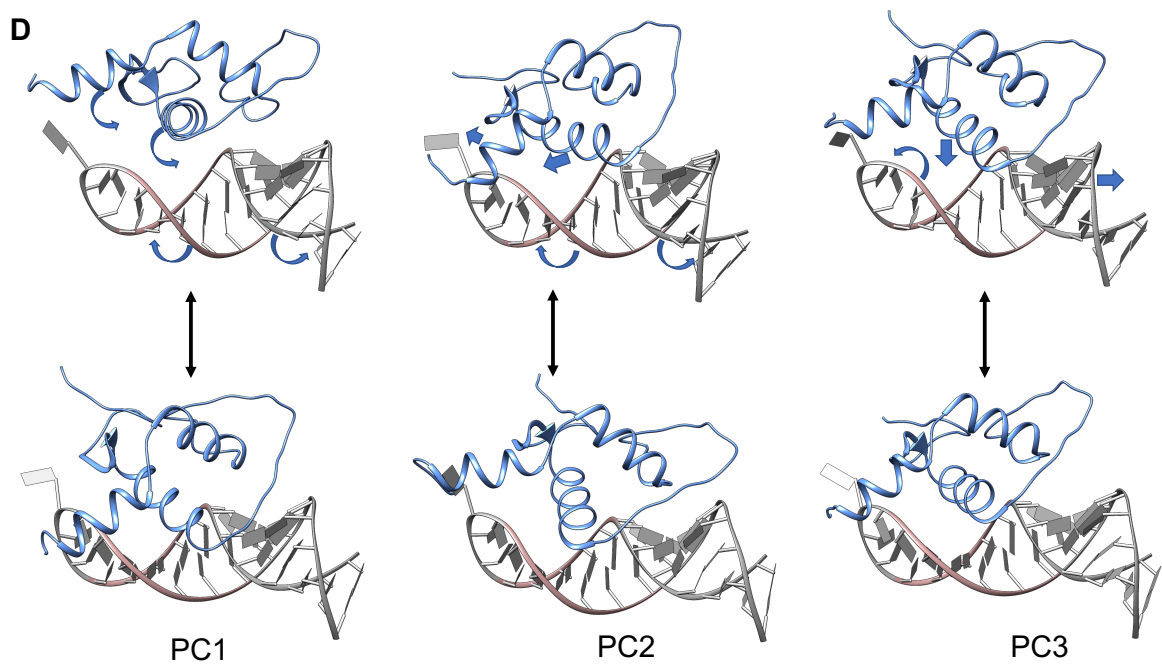

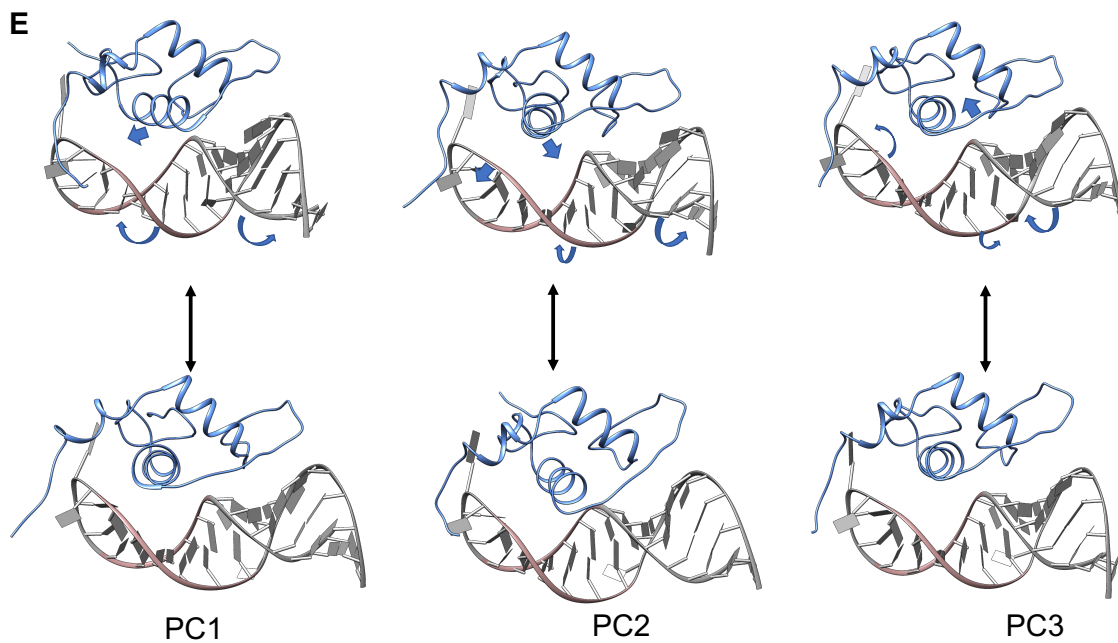

**Figure S26:** The extreme points for the first three PCs of the GR-bound **A.** DNA **B.** dsRNA **C.** GRE\_RNA **D.** Gas5\_RNA\_model1 **E.** Gas5\_RNA\_model2. Representative motions for analysis (1). Where analysis (1) is performed for the heavy atoms of the protein-DNA/RNA systems with the superposition on the nucleic acids. The blue arrows indicate the motion described by the corresponding PC.

**A**

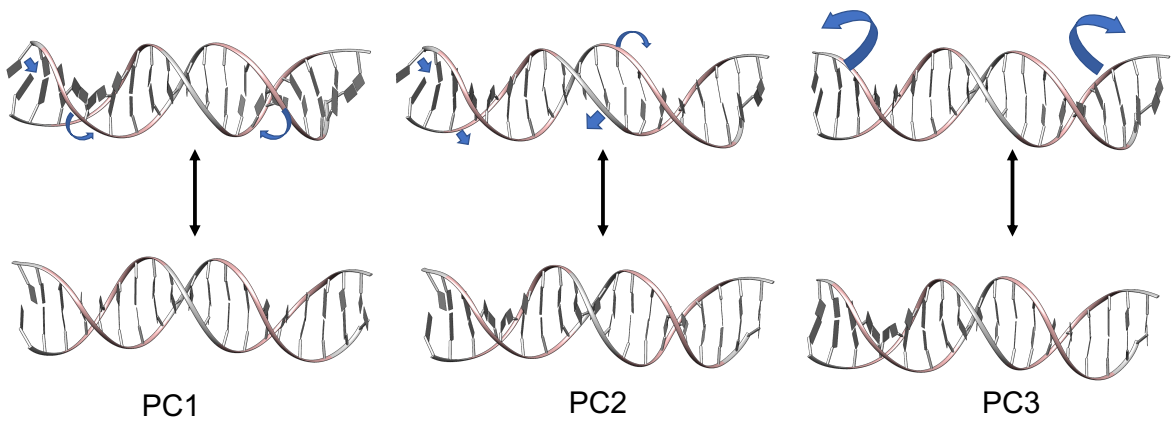

**B**

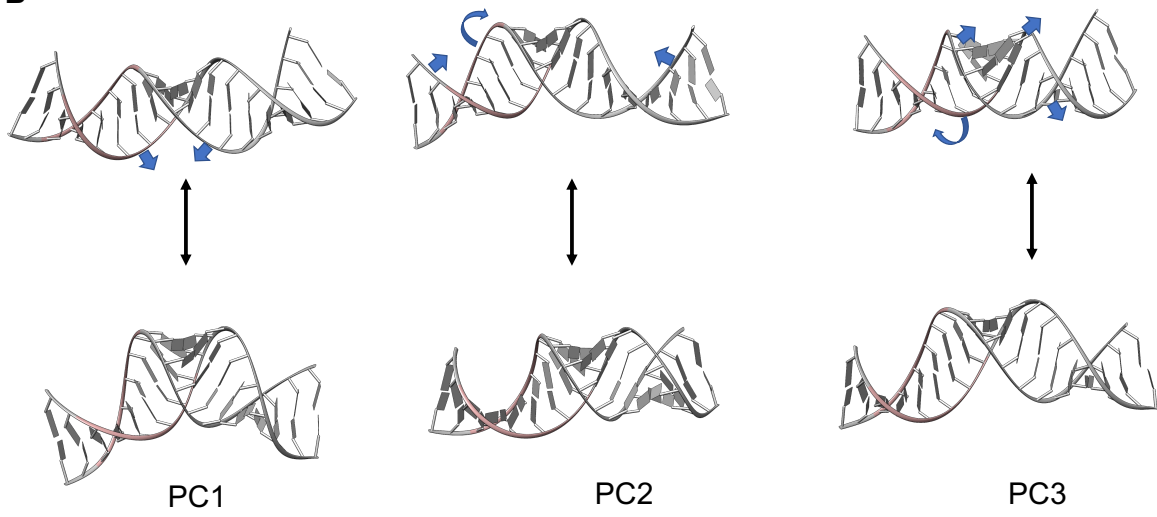

**C**

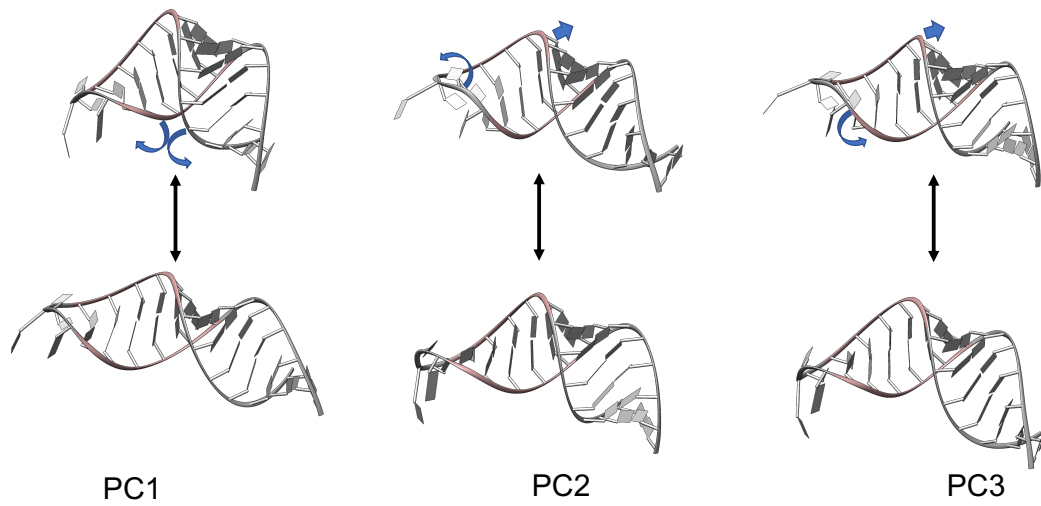

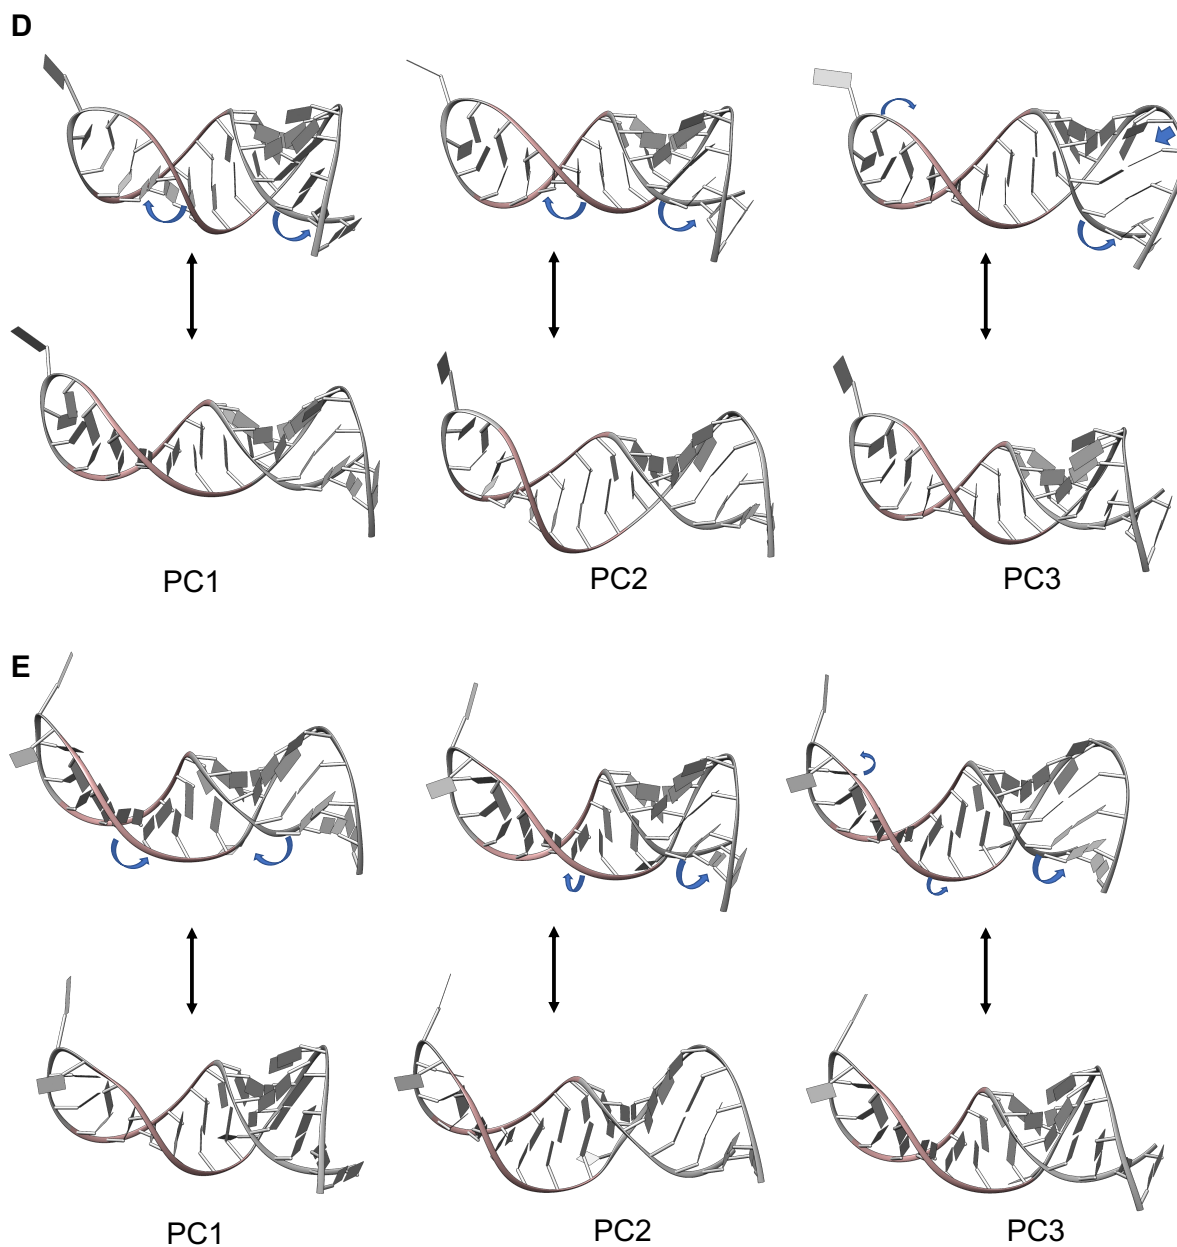

**Figure S27:** The extreme points for the first three PCs of the GR-bound **A.** DNA **B.** dsRNA **C.** GRE\_RNA **D.** Gas5\_RNA\_model1 **E.** Gas5\_RNA\_model2. Representative motions for analysis (2), which is performed for heavy atoms of DNA/RNA with the superposition on the nucleic acids. The blue arrows indicate the motion described by the corresponding PC.
